# Supplementary material for: Efficient donor–acceptor emitter based nonsymmetrical connection for organic emitting diodes with improving exciton utilization
Source: Royal Society of Chemistry journal article supplement (doi:10.1039/c9ra10513a), 2020-01-01
Supplement: c9ra10513a1.pdf [file c9ra10513a1.pdf]

## Supporting Information

### **Constructing donor-acceptor molecules as blue emitters with nonsymmetrical connection for organic emitting diodes**

**Jayaraman Jayabharathi\*, Jagathratchagan Anudeebhana, Venugopal Thanikachalam, Sekar Sivaraj, Annadurai Prabhakaran**

*Department of Chemistry, Materials science lab, Annamalai University, Annamalainagar 608 002, Tamilnadu, India*

Address for correspondence

\*Dr. J. Jayabharathi

Professor of Chemistry

Department of Chemistry

Materials science lab

Annamalai University

Annamalai nagar 608 002

Tamilnadu, India.

E-mail: [jtchalam2005@yahoo.co.in](mailto:jtchalam2005@yahoo.co.in)

# Contents

SI-I: Scheme S1

SI-II: Charge-Transfer indexes

SI-III: Figures

SI-IV: Tables

SI-I: Scheme S1. Synthetic route of *p*-PPI, *p*-CNPPI, *m*-PPI and *m*-CNPPI.

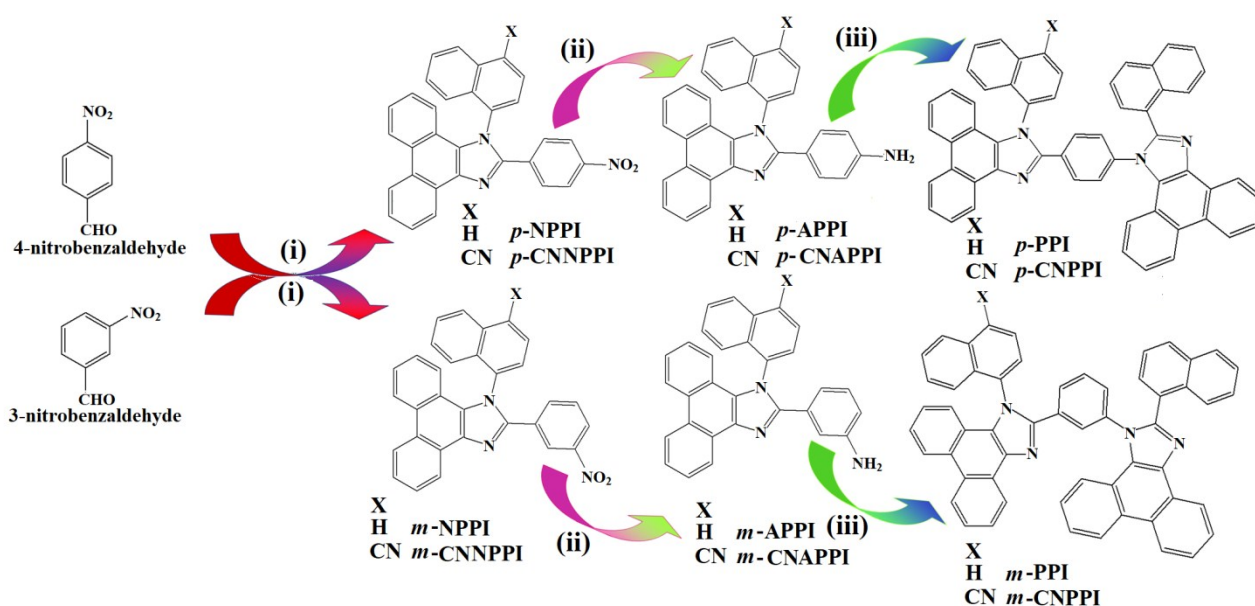

(i) phenanthrenequinone, naphthalene-1-amine, ammonium acetate, glacial acetic acid;

(ii) 10% Pd/C, 80% hydrazine hydrate, ethanol, reflux;

(iii) phenanthrenequinone, 1-naphthaldehyde, ammonium acetate, glacial acetic acid.

## I.1. 1-(naphthalen-1-yl)-2-(4-nitrophenyl)-1*H*-phenanthro [9,10-d]imidazole (*p*-NPPI)

A mixture of phenanthrene-9,10-dione (2.08 g, 10 mmol), 4-nitrobenzaldehyde (1.51 g, 10 mmol), 1-naphthylamine (4.65 g, 50 mmol) with ammonium acetate (3.08 g, 40 mmol) in acetic acid (25 ml) was refluxed at 120° C for 12 h under nitrogen atmosphere and poured into methanol. The separated yellowish green crude was purified by column with hexane: ethyl acetate as the eluent (Figure S1). <sup>1</sup>H NMR (400 MHz, CDCl<sub>3</sub>): 7.3 (d, 4H), 7.7- 7.74 (m, 5H), 7.82 - 7.88 (m, 4H), 8.12 (d, 2H), 8.25 (d, 2H), 8.93 (d, 2H). <sup>13</sup>C- NMR (CDCl<sub>3</sub>, 100 MHz): 121.6, 122.4, 124.1,

126.3, 126.6, 127.2, 127.6, 127.8, 128.3, 128.4, 130.7, 131.5, 132.2, 134.6, 136.8, 148.4, 149.4.  
MS: m/z. 465.22 [M<sup>+</sup>]; Calcd. 465.15.

### **I.2. 4-(1-(naphthalen-1-yl)-1*H*-phenanthro[9,10-d]imidazol-2-yl)benzenamine (*p*-APPI)**

A mixture of 1-(naphthalen-1-yl)-2-(4-nitrophenyl)-1*H*-phenanthro[9,10-d]imidazole (NPPI) (4.15 g, 10 mmol) and 10 % Pd/C (250 mg) in 25 ml ethanol was refluxed under stirring and 80 % hydrazine hydrate (15 ml) was added slowly for 30 min and the stirring was continued for 12 h, the reaction mixture was neutralized with aqueous HCl. The white product was recrystallized from ethanol: water mixture (Figure S2). Yield: 65%. <sup>1</sup>H NMR (400 MHz, CDCl<sub>3</sub>) 4.0 (d, 2H), 6.52 (d, 2H), 7.23 (d, 2H), 7.3 (t, 4H), 7.7 (d, 2H), 7.82-7.88 (m, 4H), 8.12 (d, 2H), 8.93 (d, 2H). <sup>13</sup>C NMR (CDCl<sub>3</sub>, 100 MHz): 116.8, 120.7, 122.4, 124.1, 126.3, 126.6, 127.2, 127.6, 127.8, 128.3, 130.7, 131.5, 132.2, 134.6, 148.4, 149.4. MS: m/z. 435.22 [M<sup>+</sup>]; Calcd. 435.17.

### **I.3. 2-(naphthalen-1-yl)-1-(4-(1-(naphthalen-1-yl)-1*H*-phenanthro[9,10-d]imidazol-2-yl)phenyl)-1-*H*-phenanthro[9,10-d]imidazole (*p*-PPI)**

A mixture of phenanthrenequinone (0.416 g, 2 mmol), 1-naphthaldehyde (0.698 g, 2 mmol), 4-(1-(naphthalen-1-yl)-1*H*-phenanthro[9,10-d]imidazol-2-yl)benzenamine (APPI) (1.16 g, 3 mmol), ammonium acetate (1.54 g, 20 mmol) and glacial acetic acid (25 ml) was refluxed at 120° C for 12 h under nitrogen atmosphere [25] and poured into methanol. The separated white solid was subjected to water washings and purified by column using CH<sub>2</sub>Cl<sub>2</sub> as the eluent (Figure S3). Yield: 52%. <sup>1</sup>H NMR (400 MHz, CDCl<sub>3</sub>, ppm): 7.3 (d, 3H), 7.32-7.38 (m, 6H), 7.5-7.54 (m, 3H), 7.63-7.70 (m, 6H), 7.82 (m, 4H), 7.88 (m, 4H), 8.12 (d, 4H), 8.93 (d, 4H). <sup>13</sup>C NMR (CDCl<sub>3</sub>, 100 MHz): (122.4, 122.9, 124.1, 124.7, 126.3, 126.6, 126.8, 127.6, 127.8, 128.3, 128.4, 130.2, 130.7, 131.5, 132.2, 132.7, 134.2, 134.6, 136.0, 137.4, 149.4. MALDI-TOF MS: m/z. 761.50 [M]<sup>+</sup> (calcd: 762.28). Anal. calcd (%) for C<sub>56</sub>H<sub>34</sub>N<sub>4</sub>: C, 88.16; H, 4.49; N, 7.34. Found: C, 88.14; H, 4.80; N, 7.35.

#### **I.4. 4-(2-(4-nitrophenyl)-1*H*-phenanthro[9,10-*d*]imidazol-1-yl)naphthalene-1-carbonitrile (*p*-CNNPPI)**

The *p*-CNNPPI was synthesized using 4-aminonaphthalene-1-carbonitrile and the methodology is similar to that of *p*-NPPI (Figure S4). <sup>1</sup>H NMR (400 MHz, CDCl<sub>3</sub>) 7.4 (d, 1H), 7.5 - 7.6 (m, 2H), 7.74 - 7.88 (m, 8H), 8.12 - 8.25 (m, 5H), 8.93 (d, 2H). <sup>13</sup>C NMR (CDCl<sub>3</sub>, 100 MHz): 109.5, 115.8, 116.8, 121.6, 121.7, 122.4, 123.8, 126.5, 126.6, 127.5, 127.6, 128.3, 128.4, 128.5, 131.5, 132.7, 133.4, 136.0, 136.8, 148.4, 149.4. MS: m/z. 490.19 [M<sup>+</sup>]; Calcd. 490.14.

#### **I.5. 4-(2-(4-aminophenyl)-1*H*-phenanthro[9,10-*d*]imidazol-1-yl)naphthalene-1-carbonitrile (*p*-CNAPPI)**

Compound *p*-CNAPPI was synthesized using *p*-CNNPPI and the methodology is similar to that of *p*-APPI (Figure S5). <sup>1</sup>H NMR (400 MHz, CDCl<sub>3</sub>) 4.0 (d, 2H), 6.52 (d, 2H), 7.23 (t, 2H), 7.4 (d, 1H), 7.5-7.6 (m, 2H), 7.8 - 7.88 (m, 6H), 8.12 - 8.2 (m, 3H), 8.93 (d, 2H). <sup>13</sup>C NMR (CDCl<sub>3</sub>, 100 MHz): 109.5, 115.8, 116.8, 120.7, 121.7, 122.4, 123.8, 126.5, 126.6, 127.5, 127.6, 128.3, 128.5, 131.5, 132.7, 133.4, 136.0, 148.4, 149.4. MS: m/z. 460.28 [M<sup>+</sup>]; Calcd. 460.17.

#### **I.5. 4-(2-(4-(2-(naphthalen-1-yl)-1*H*-phenanthro[9,10-*d*]imidazol-1-yl)phenyl)-1*H*-phenanthro[9,10-*d*]imidazol-1-yl)naphthalene-1-carbonitrile (*p*-CNPPI)**

The *p*-CNPPI was synthesized using *p*-CNAPPI and the methodology is similar to that of *p*-PPI (Figure S6). Yield: 70%, <sup>1</sup>H NMR (400 MHz, CDCl<sub>3</sub>, ppm): (7.3 (d, 2H), 7.32 - 7.54 (m, 8H), 7.6 - 7.67 (m, 4H), 7.8 - 7.82 (m, 7H), 7.88 (m, 4H), 8.12 (m, 4H), 8.93 (d, 2H). <sup>13</sup>C NMR (CDCl<sub>3</sub>, 100 MHz): 109.5, 115.8, 121.7, 122.4, 122.9, 123.8, 124.7, 126.3, 126.5, 126.6, 127.5, 127.6, 128.3, 128.4, 128.5, 130.2, 131.5, 132.7, 133.4, 134.2, 136.0, 137.4, 149.4. MALDI-TOF MS: m/z. 787.38 [M]<sup>+</sup> (calcd: 787.27). Anal. calcd (%) for C<sub>57</sub>H<sub>33</sub>N<sub>5</sub>: C, 86.89; H, 4.22; N, 8.89. Found: C, 86.66; H, 4.32; N, 8.71.

#### **I.6. 4-(2-(3-nitrophenyl)-1*H*-phenanthro[9,10-*d*]imidazol-1-yl)naphthalene-1-carbonitrile (*m*-NPPI)**

The synthetic methodology is similar to that of *p*-NPPI by using *m*-nitrobenzaldehyde instead of *p*-nitrobenzaldehyde. Yield 68% (Figure S7). <sup>1</sup>H NMR (400 MHz, CDCl<sub>3</sub>, ppm): 7.3 (d, 4H), 7.58-7.7 (m, 4H), 7.82 - 7.88 (m, 10 H), 8.12 - 8.15 (t, 3H), 8.41 (s, 1H), 8.93 (d, 2H). <sup>13</sup>C NMR

(CDCl<sub>3</sub>, 100 MHz): 121.1, 122.1, 122.4, 124.1, 126.3, 126.6, 127.6, 127.8, 128.3, 130.2, 130.7, 131.5, 131.6, 132.2, 133.6, 134.6, 148.0, 149.4. MALDI-TOF MS: m/z. 465.22 [M]<sup>+</sup> (calcd: 465.15). Anal. calcd (%) for C<sub>31</sub>H<sub>19</sub>N<sub>3</sub>O<sub>2</sub>: C, 79.99; H, 4.11; N, 9.03. Found: C, 80.11; H, 4.32; N, 9.25.

**I.7. 3-(1-(naphthalen-1-yl)-1*H*-phenanthro[9,10-d]imidazol-2-yl)benzenamine (*m*-APPI)**

Yield 70% (Figure S8). <sup>1</sup>H NMR (400 MHz, CDCl<sub>3</sub>, ppm): 4.0 (d, 2H), 6.42 (d, 1H), 6.68 (d, 1H), 6.84 - 7.3 (m, 6H), 7.7 (d, 3H), 7.82 -7.88 (m, 4H), 8.12 (d, 2H), 8.93 (d, 2H). <sup>13</sup>C NMR (CDCl<sub>3</sub>, 100 MHz): 114.2, 116.3, 117.5, 122.4, 124.1, 126.3, 126.6, 127.2, 127.6, 127.8, 128.3, 130.1, 130.7, 131.5, 132.2, 134.6, 148.9, 149.4. MALDI-TOF MS: m/z. 435.12 [M]<sup>+</sup> (calcd: 435.17).

**I.8. 2-(naphthalen-1-yl)-1-(3-(1-(naphthalen-1-yl)-1*H*-phenanthro[9,10-d]imidazol-2-yl)phenyl)-1*H*-phenanthro[9,10-d]imidazole (*m*-PPI)**

Yield 70% (Figure S9). <sup>1</sup>H NMR (400 MHz, CDCl<sub>3</sub>, ppm): 7.2 (d, 1H), 7.3-7.32 (m, 6H), 7.38 -7.54 (m, 4H), 7.67-7.7 (m, 5H), 7.82-7.88 (m, 8H), 8.12 (d, 4H), 8.93 (d, 4H). <sup>13</sup>C NMR (CDCl<sub>3</sub>, 100 MHz): 22.6, 119.5, 122.4, 124.1, 124.7, 126.3, 126.6, 126.8, 127.6, 127.8, 128.3, 130.2, 130.7, 131.5, 131.6, 132.2, 132.7, 134.2, 134.6, 136.0, 137.9, 149.4. MALDI-TOF MS: m/z. 762.32 [M]<sup>+</sup> (calcd: 762.28). Anal. calcd (%) for C<sub>56</sub>H<sub>34</sub>N<sub>4</sub>: C, 88.16; H, 4.49; N, 7.34. Found: C, 88.11; H, 4.56; N, 7.22.

**I.9. 4-(2-(3-nitrophenyl)-1*H*-phenanthro[9,10-d]imidazol-1-yl)naphthalene-1-carbonitrile(*m*-CNNPPI)**

Yield 70% (Figure S10). <sup>1</sup>H NMR (400 MHz, CDCl<sub>3</sub>, ppm): 7.4 (d, 1H), 7.5 -7.6 (m, 3H), 7.8 -7.87 (m, 7H), 8.15-8.2 (m, 4H), 8.41 (s, 1H), 8.93 (d, 2H). <sup>13</sup>C NMR (CDCl<sub>3</sub>, 100 MHz): 109.5, 115.8, 121.1, 121.7, 122.1, 122.4, 123.8, 126.5, 126.6, 127.5, 127.6, 128.3, 128.5, 130.2, 131.5, 131.6, 132.7, 133.4, 133.6, 136.0, 148.0, 149.4. MALDI-TOF MS: m/z. 490.21 [M]<sup>+</sup> (calcd: 490.14).

**I.10. 4-(2-(3-aminophenyl)-1*H*-phenanthro[9,10-d]imidazol-1-yl)naphthalene-1-carbonitrile (*m*-CNAPPI)**

Yield 70%(Figure S11). <sup>1</sup>H NMR (400 MHz, CDCl<sub>3</sub>, ppm): 4.0 (d, 2H), 6.42 (d, 1H), 6.68

(d, 1H), 6.84 (t, 1H), 7.07 (m, 1H), 7.4 (d, 1H), 7.5 -8.12 (m, 8H), 8.12 -8.2 (m, 3H), 8.93 (d, 2H). <sup>13</sup>C NMR (CDCl<sub>3</sub>, 100 MHz): 109.5, 114.2, 115.8, 116.3, 117.5, 121.7, 122.4, 123.8, 126.5, 126.6, 127.5, 127.6, 128.3, 128.5, 130.1, 131.5, 132.7, 133.4, 136.0, 148.9, 149.4. MALDI-TOF MS: m/z. 460.28 [M]<sup>+</sup> (calcd: 460.17).

**I.11. 4-(2-(3-(2-(naphthalen-1-yl)-1*H*-phenanthro[9,10-*d*]imidazol-1-yl)phenyl)-1*H*-phenanthro[9,10-*d*]imidazol-1-yl)naphthalene-1-carbonitrile(*m*-CNPPI)**

Yield 70%(Figure S12). <sup>1</sup>H NMR (400 MHz, CDCl<sub>3</sub>, ppm): 7.2 (d, 1H), 7.3-7.32 (m, 3H), 7.38-7.5 (m, 6H), 7.54-7.67 (m, 5H), 7.80-7.88 (m, 10H), 8.12-8.2 (m, 5H), 8.93 (d, 4H). <sup>13</sup>C NMR (100 MHz, CDCl<sub>3</sub>): (109.5, 115.8, 119.5, 121.7, 122.4, 123.8, 124.7, 126.3, 126.5, 126.6, 126.8, 127.6, 128.3, 128.5, 130.2, 131.5, 131.6, 132.7, 133.4, 134.2, 136.0, 137.9, 149.4. MALDI-TOF MS: m/z. 787.10 [M]<sup>+</sup> (calcd: 787.27). Anal. calcd (%) for C<sub>57</sub>H<sub>33</sub>N<sub>5</sub>: C, 86.89; H, 4.22; N, 8.89. Found: C, 86.72; H, 4.41; N, 8.94.

**Figure S1. <sup>1</sup>H and <sup>13</sup>C NMR spectra of *p*-NPPI**

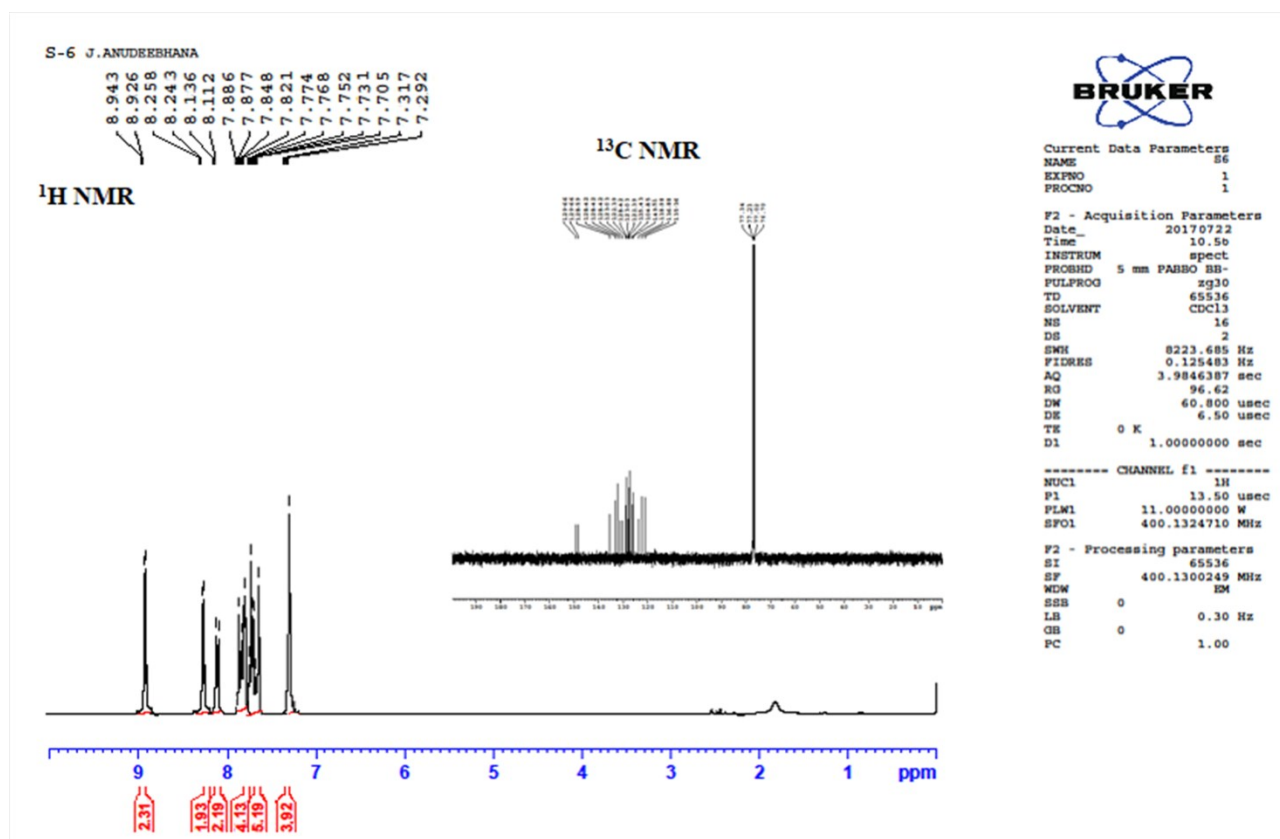

Figure S2.  $^1\text{H}$  and  $^{13}\text{C}$  NMR spectra of *p*-APPI

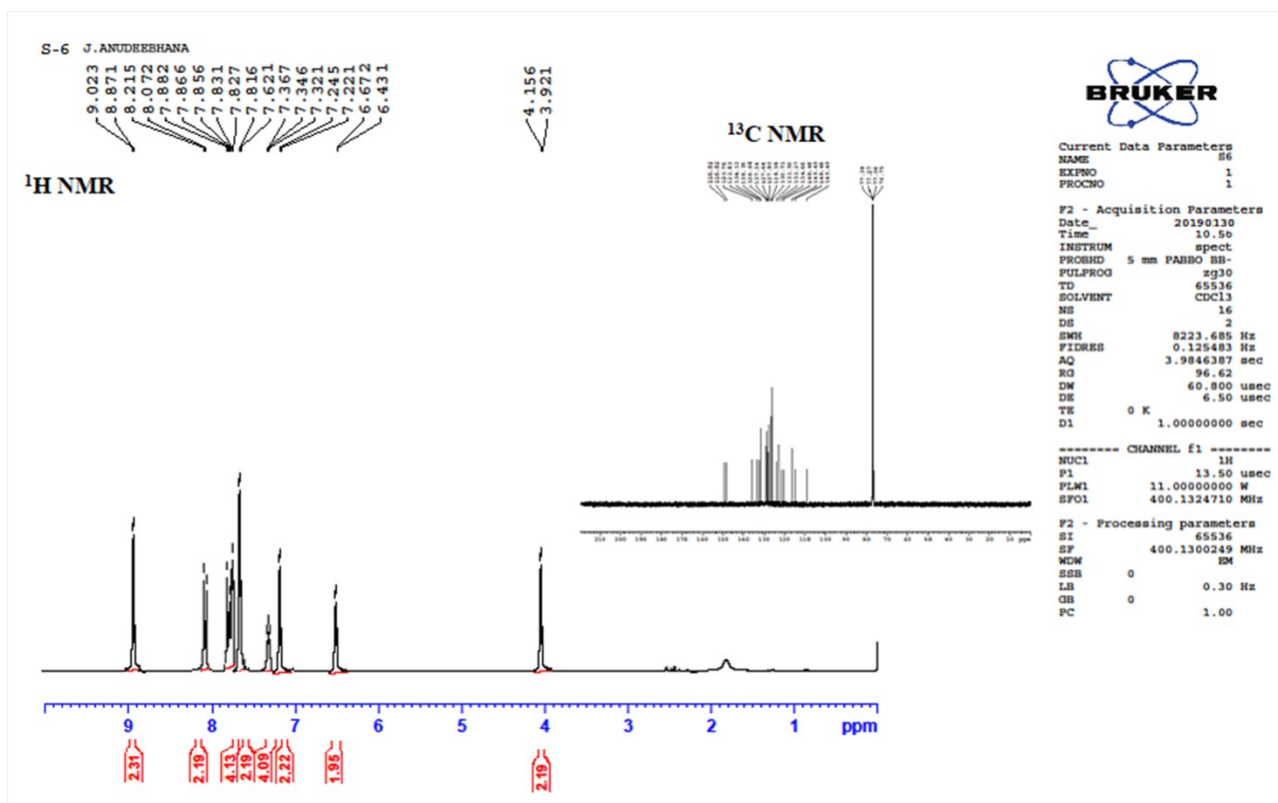

Figure S3.  $^1\text{H}$  and  $^{13}\text{C}$  NMR spectra of *p*-PPI

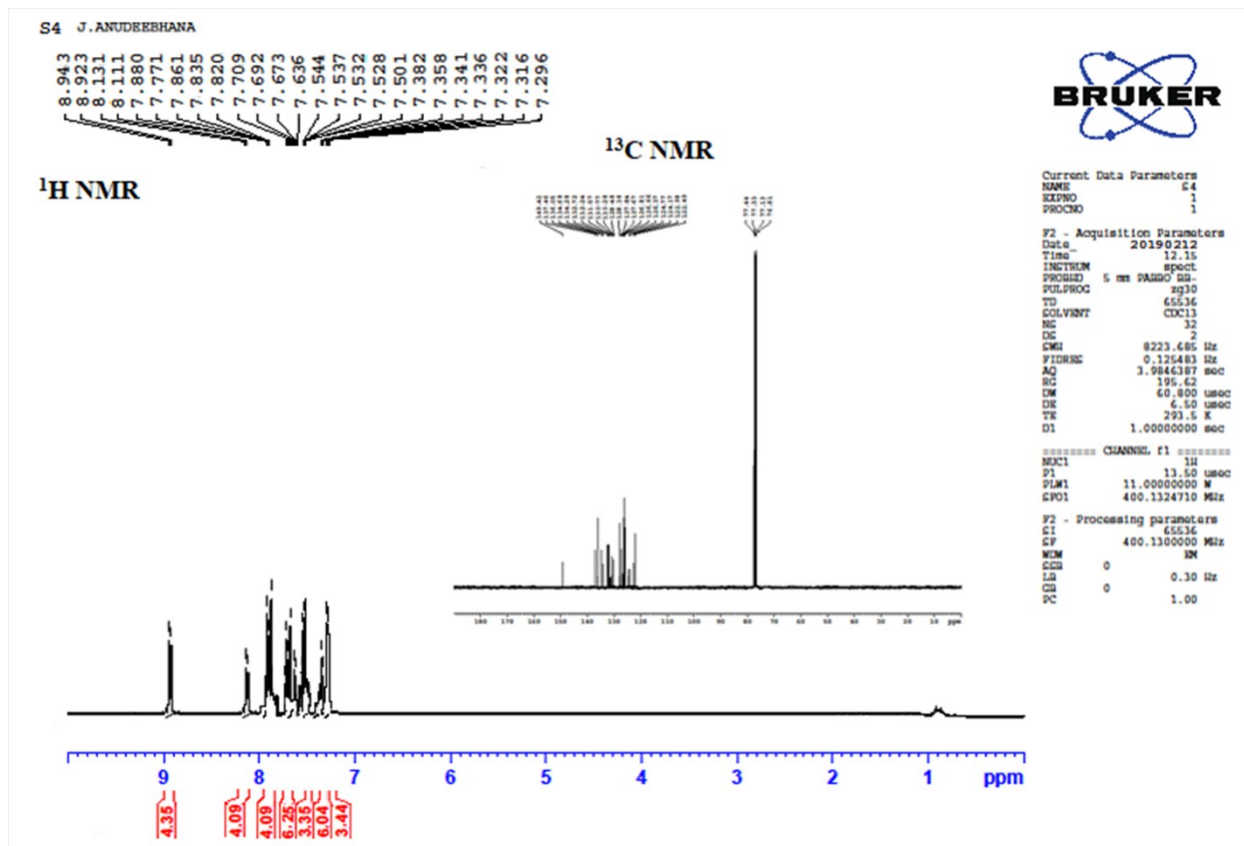

Figure S4.  $^1\text{H}$  and  $^{13}\text{C}$  NMR spectra of *p*-CNNPPI

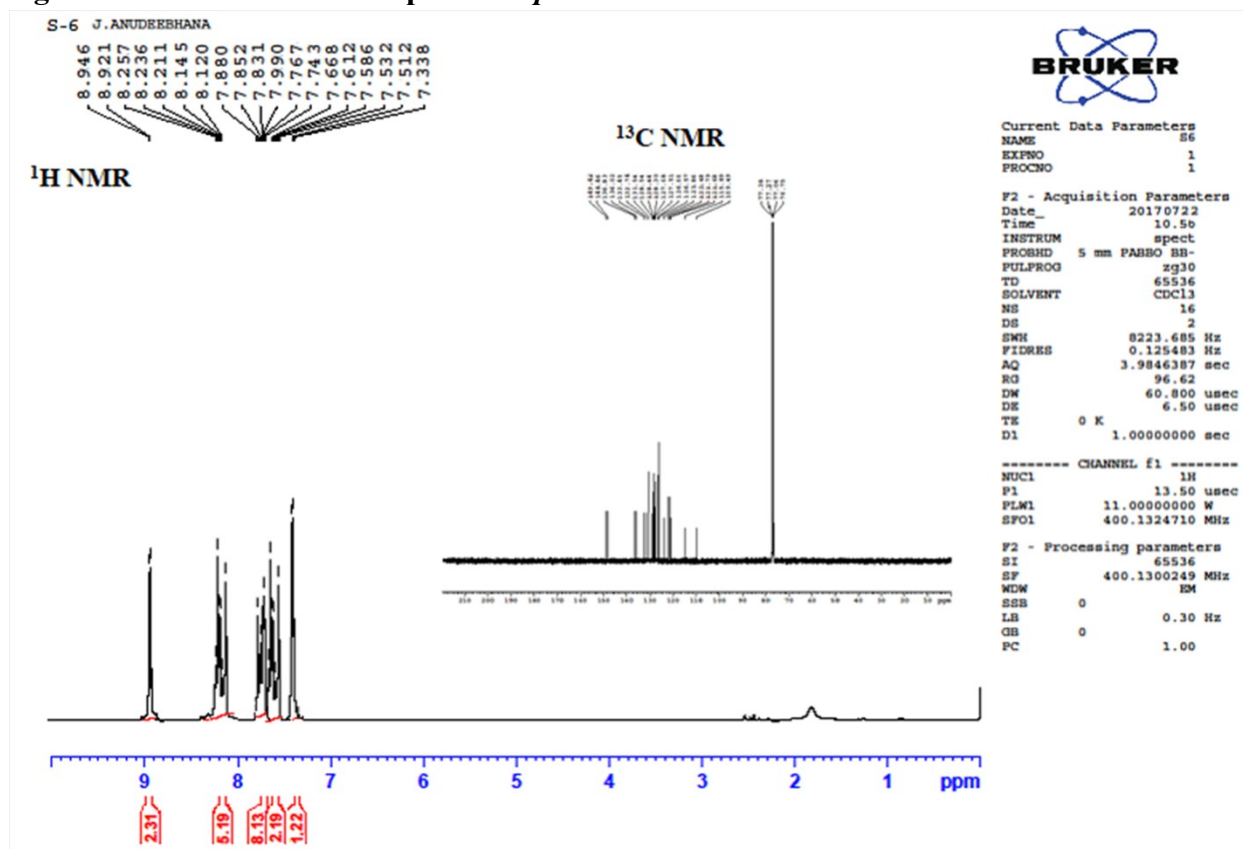

Figure S5.  $^1\text{H}$  and  $^{13}\text{C}$  NMR spectra of *p*-CNAPPI

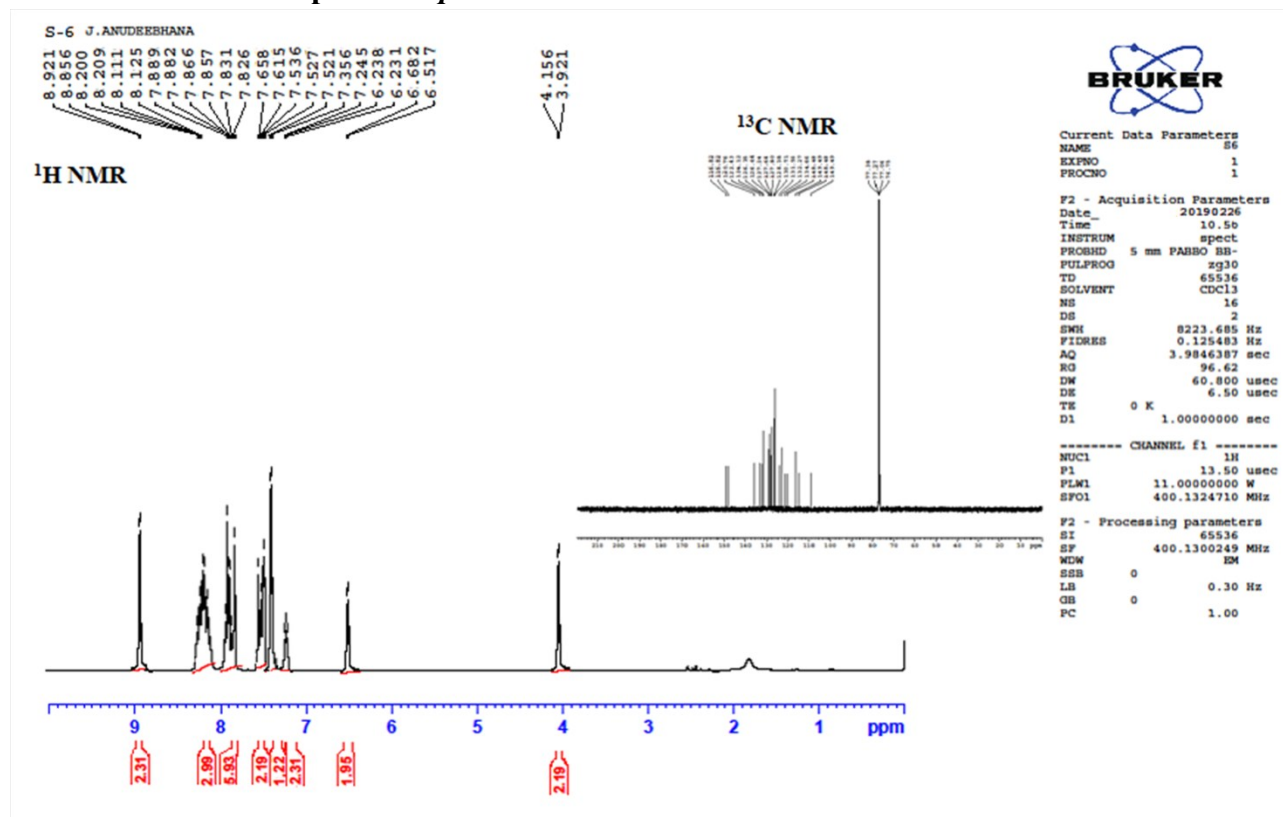



Figure S6.  $^1\text{H}$  and  $^{13}\text{C}$  NMR spectra of *p*-CNPII

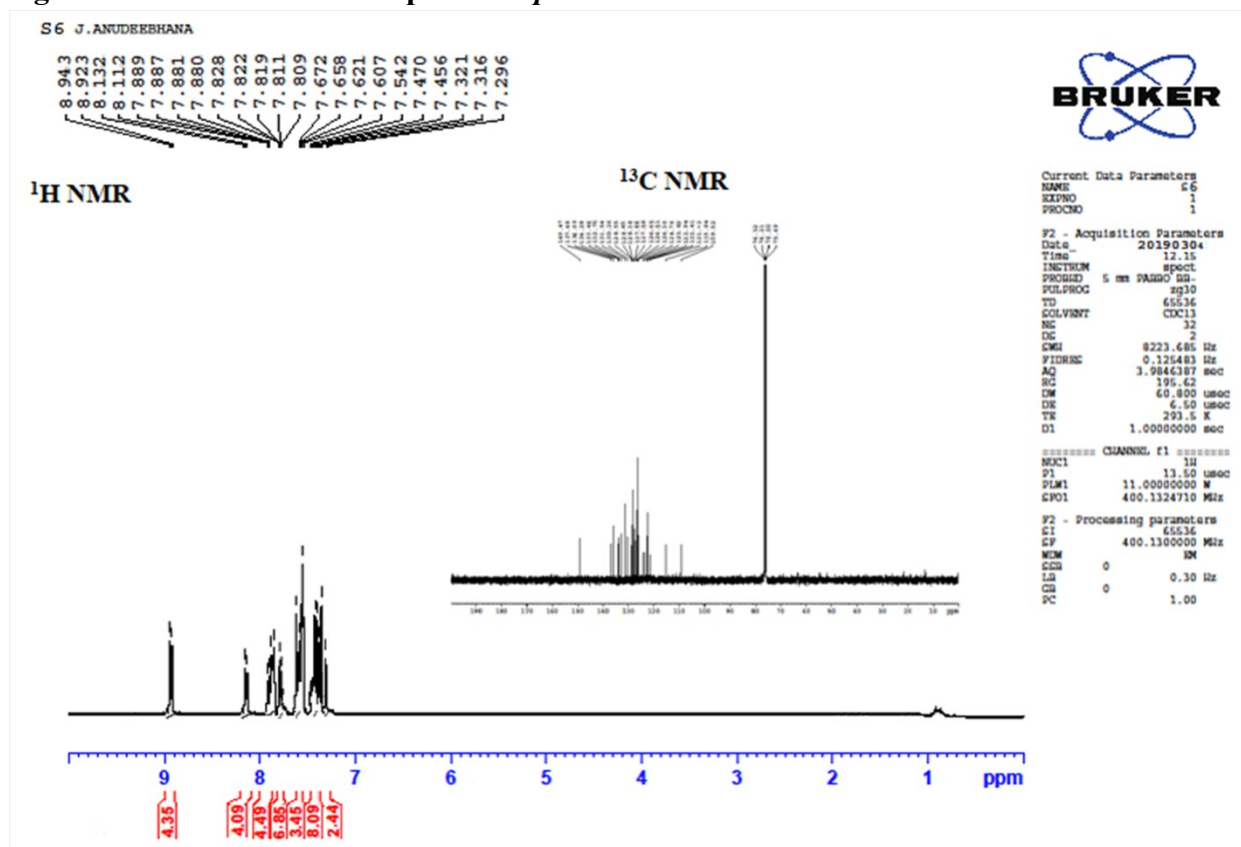

Figure S7.  $^1\text{H}$  and  $^{13}\text{C}$  NMR spectra of *m*-NPPI

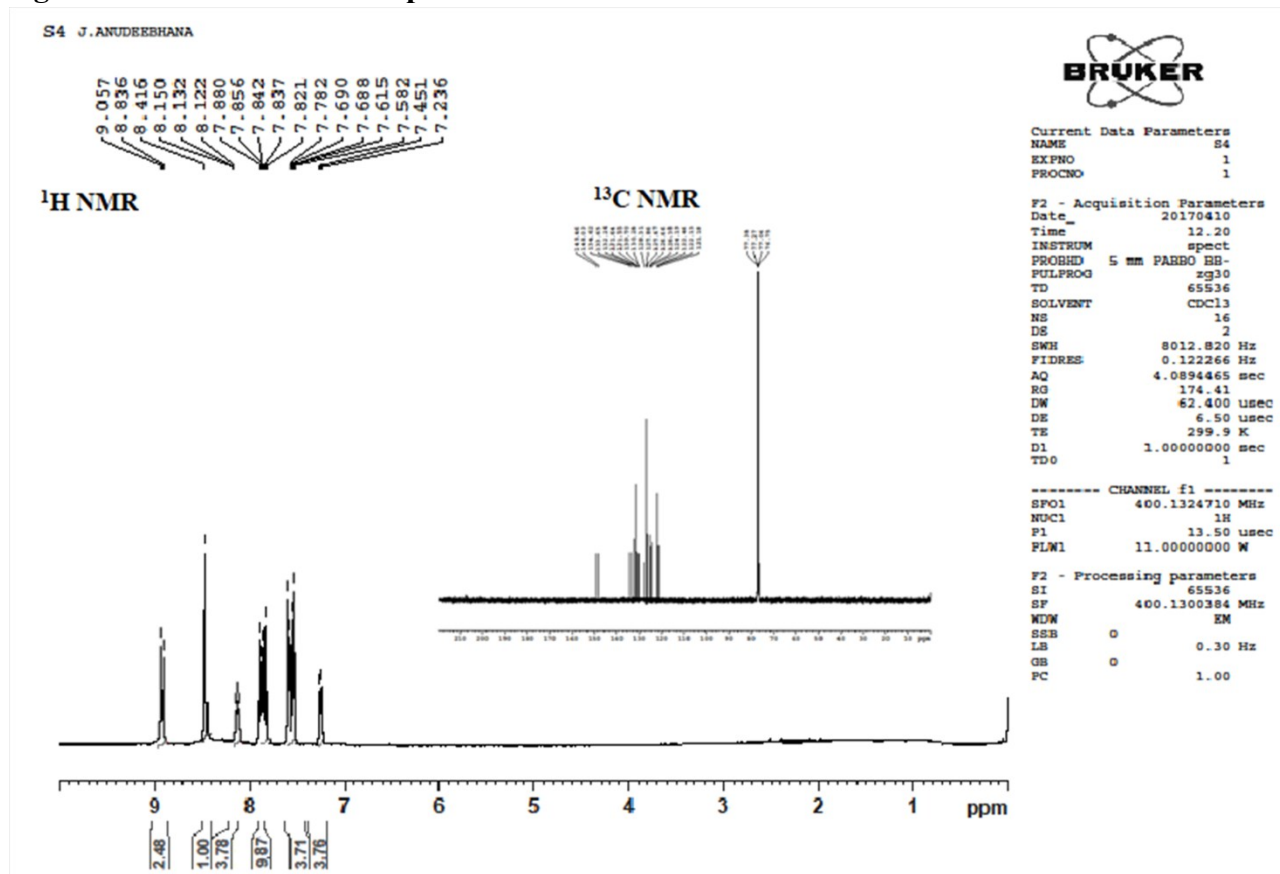

Figure S8.  $^1\text{H}$  and  $^{13}\text{C}$  NMR spectra of *m*-APPI

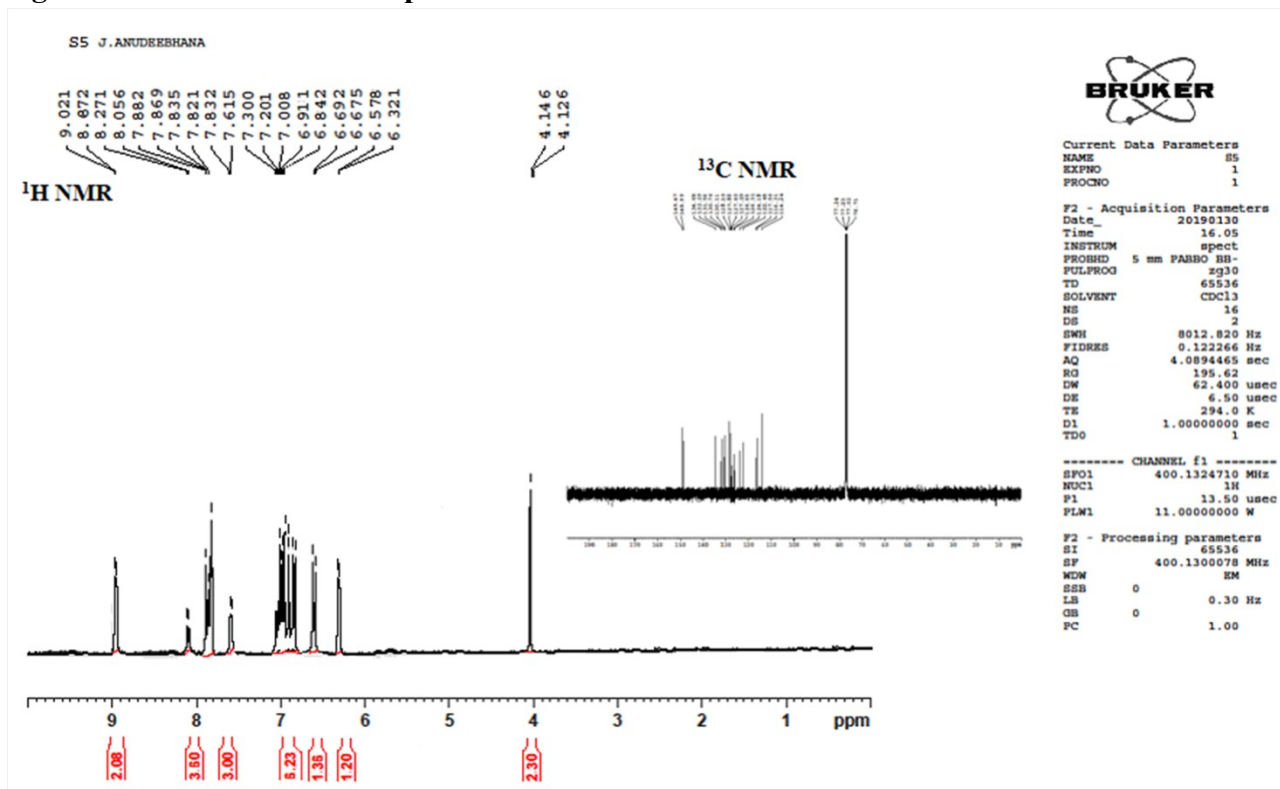

Figure S9.  $^1\text{H}$  and  $^{13}\text{C}$  NMR spectra of *m*-PPI

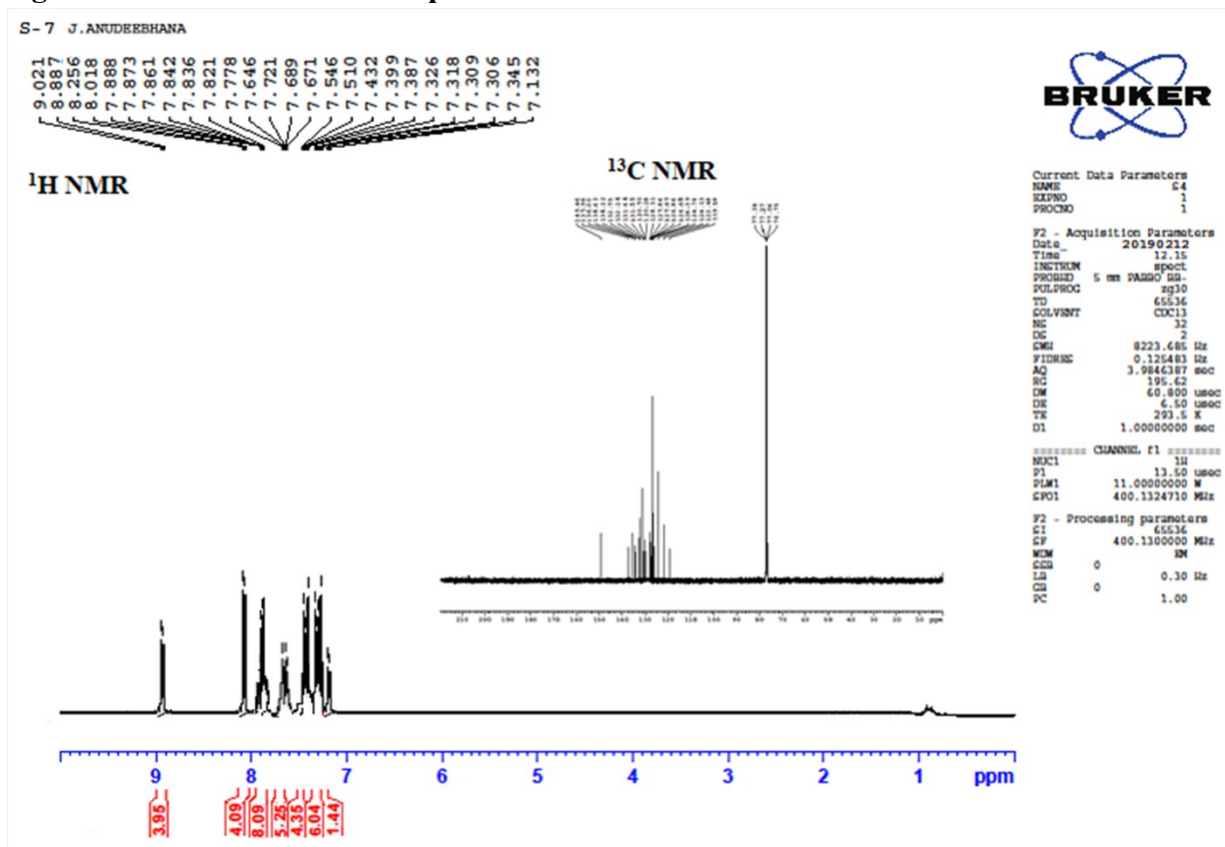

Figure S10  $^1\text{H}$  and  $^{13}\text{C}$  NMR spectra of *m*-CNNPPI

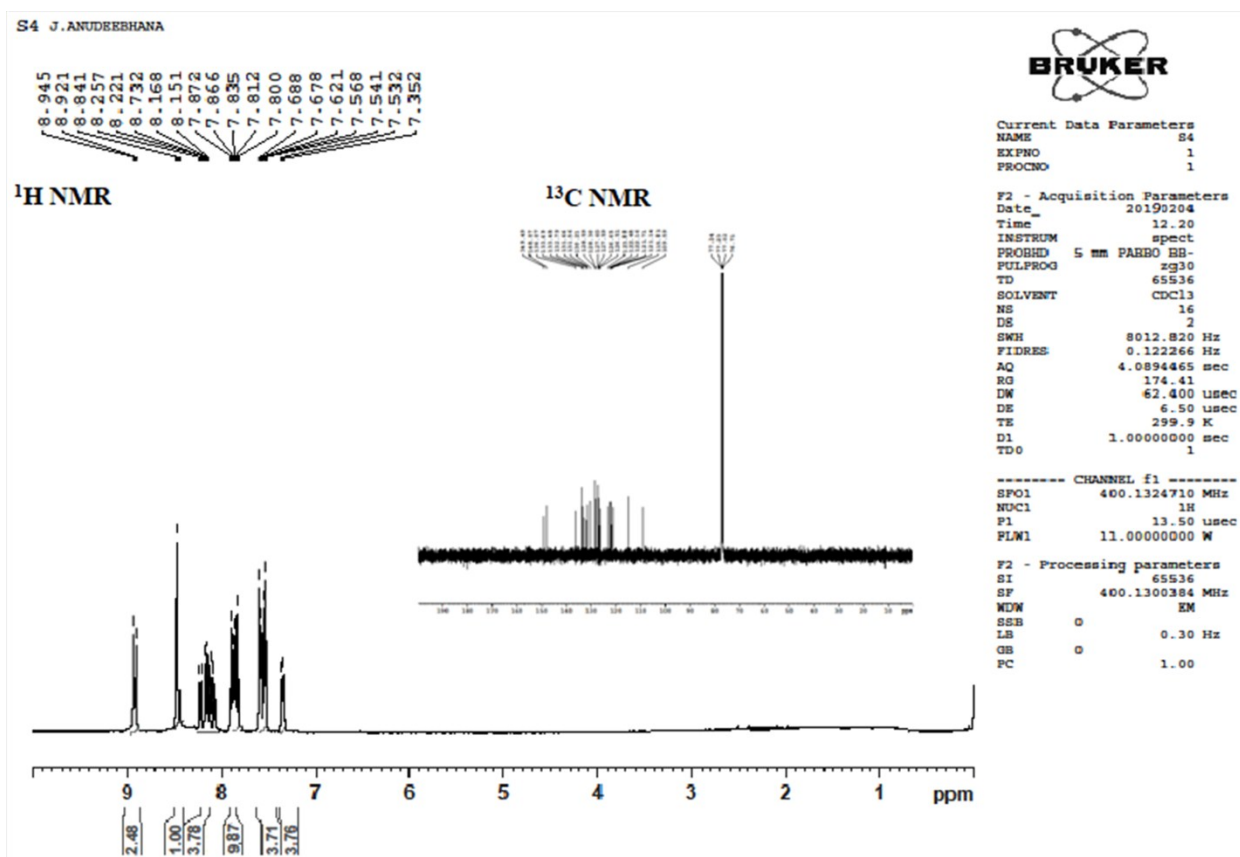

Figure S11.  $^1\text{H}$  and  $^{13}\text{C}$  NMR spectra of *m*-CNAPPI

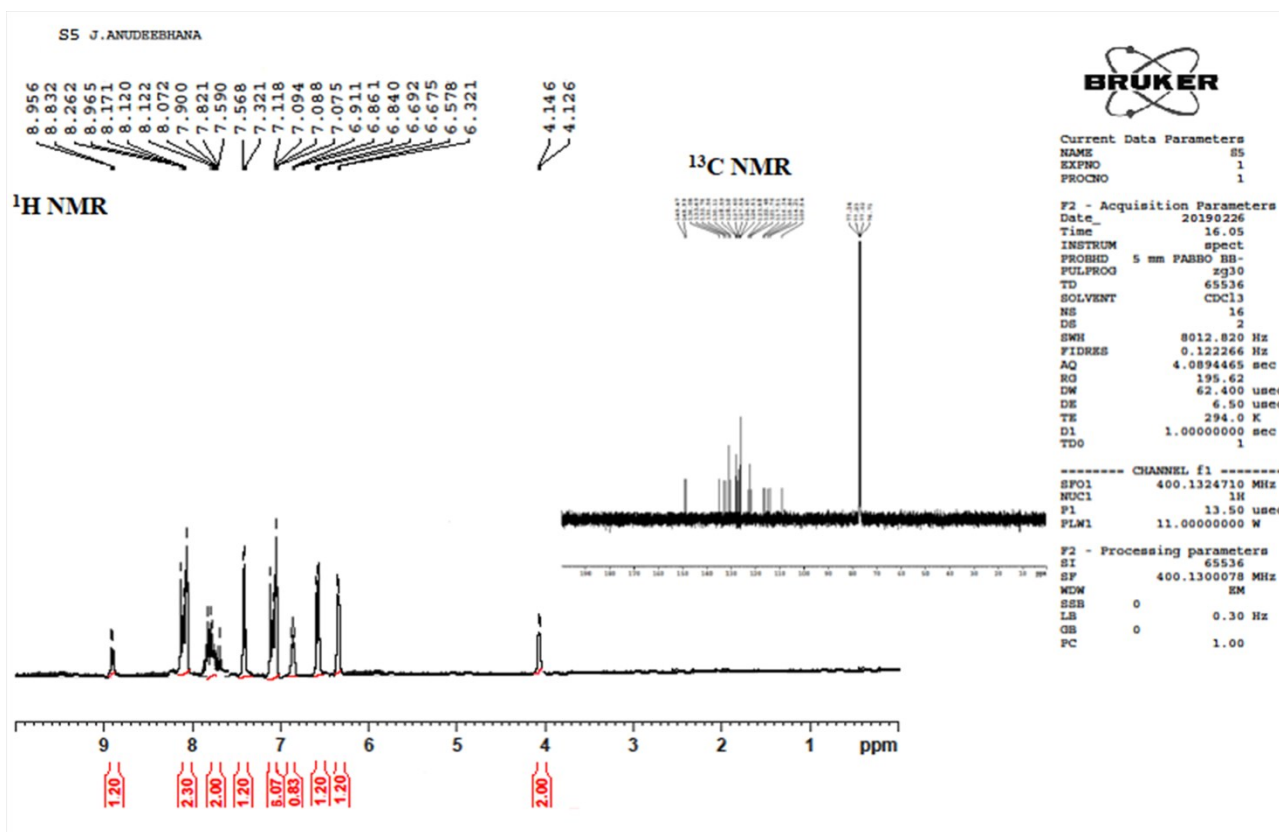

Figure S12.  $^1\text{H}$  and  $^{13}\text{C}$  NMR spectra of *m*-CNPPI

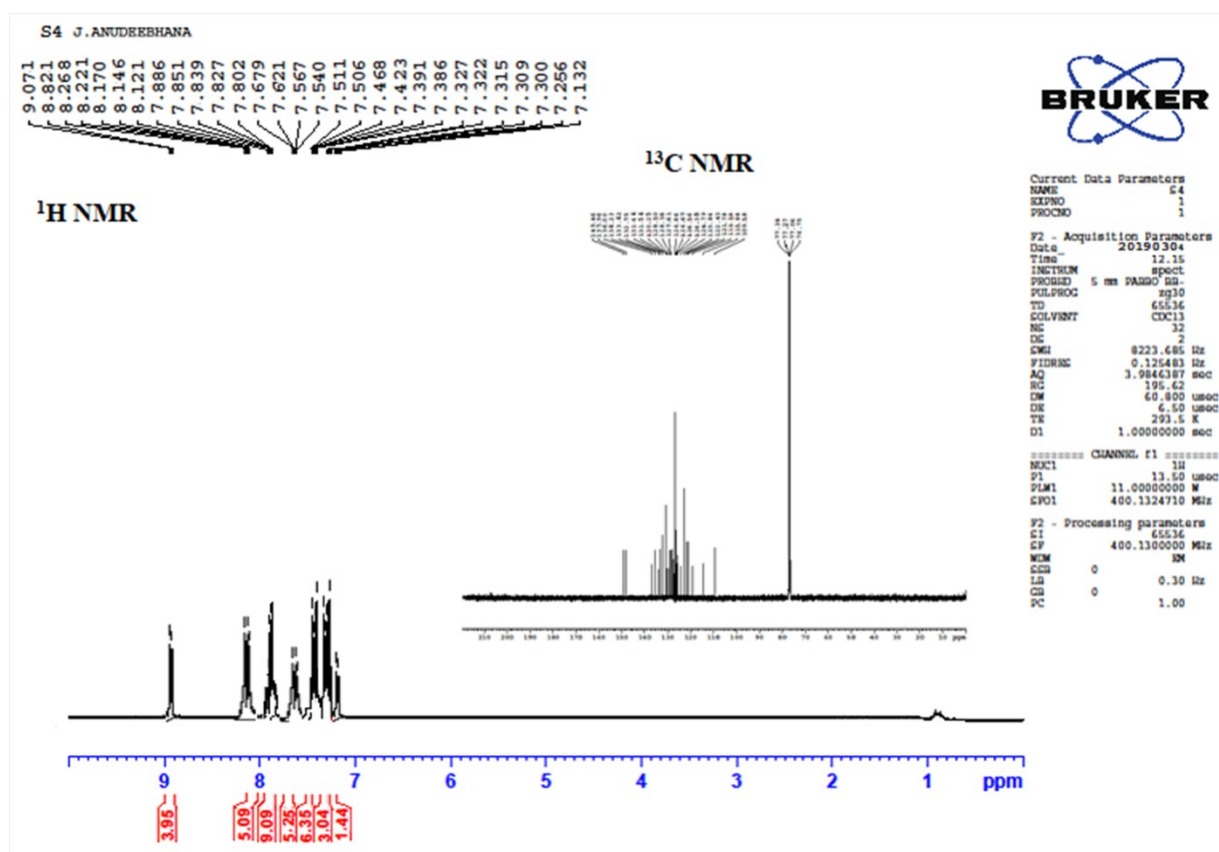

### SI-II: Charge-Transfer indexes

The hole-particle pair interactions have been related to the distance covered during the excitations one possible descriptor  $\Delta r$  index could be used to calculate the average distance which is weighted in function of the excitation coefficients.

$$\Delta r = \frac{\sum_{ia} k_{ia}^2 |\langle \varphi_a | r | \varphi_a \rangle - \langle \varphi_i | r | \varphi_i \rangle|}{\sum_{ia} K_{ia}^2} \dots\dots\dots (S1)$$

where  $|\langle \varphi_i | r | \varphi_i \rangle|$  is the norm of the orbital centroid [1–4].  $\Delta r$ -index will be expressed in Å.

The density variation associated to the electronic transition is given by

$$\Delta \rho(r) = \rho_{EX}(r) - \rho_{GS}(r) \dots\dots\dots (S2)$$

where  $\rho_{GS}(r)$  and  $\rho_{EX}(r)$  are the electronic densities of to the ground and excited states, respectively. Two functions,  $\rho_+(r)$  and  $\rho_-(r)$ , corresponds to the points in space where an

increment or a depletion of the density upon absorption is produced and they can be defined as follows:

$$\rho_+(r) = \begin{cases} \Delta\rho(r) & \text{if } \Delta\rho(r) > 0 \\ 0 & \text{if } \Delta\rho(r) < 0 \end{cases} \dots\dots\dots (S3)$$

$$\rho_-(r) = \begin{cases} \Delta\rho(r) & \text{if } \Delta\rho(r) < 0 \\ 0 & \text{if } \Delta\rho(r) > 0 \end{cases} \dots\dots\dots (S4)$$

The barycenters of the spatial regions  $R_+$  and  $R_-$  are related with  $\rho_+(r)$  and  $\rho_-(r)$  and are shown as

$$R_+ = \frac{\int r\rho_+(r)dr}{\int \rho_+(r)dr} = (x_+, y_+, z_+) \dots\dots\dots (S5)$$

$$R_- = \frac{\int r\rho_-(r)dr}{\int \rho_-(r)dr} = (x_-, y_-, z_-) \dots\dots\dots (S6)$$

The spatial distance ( $D_{CT}$ ) between the two barycenters  $R_+$  and  $R_-$  of density distributions can thus be used to measure the CT excitation length

$$D_{CT} = |R_+ - R_-| \dots\dots\dots (S7)$$

The transferred charge ( $q_{CT}$ ) can be obtained by integrating over all space  $\rho_+$  ( $\rho_-$ ). Variation in dipole moment between the ground and the excited states ( $\mu_{CT}$ ) can be computed by the following relation:

$$\|\mu_{CT}\| = D_{CT} \int \rho_+(r)dr = D_{CT} \int \rho_-(r)dr \dots\dots\dots (S8)$$

$$= D_{CT}q_{CT} \dots\dots\dots (S9)$$

The difference between the dipole moments  $\|\mu_{CT}\|$  have been computed for the ground and the excited states  $\Delta\mu_{ES-GS}$ . The two centroids of charges ( $C^+/C^-$ ) associated to the positive and negative

density regions are calculated as follows. First the root-mean-square deviations along the three axis ( $\sigma_{aj}$ ,  $j = x, y, z$ ;  $a = +$  or  $-$ ) are computed as

$$\sigma_{a,j} = \sqrt{\frac{\sum_i \rho_a(r_i)(j_i - j_a)^2}{\sum_i \rho_a(r_i)}} \dots\dots\dots (S10)$$

The two centroids ( $C_+$  and  $C_-$ ) are defined as

$$C_+(r) = A_+ e\left(-\frac{(x - x_+)^2}{2\sigma_{+x}^2} - \frac{(y - y_+)^2}{2\sigma_{+y}^2} - \frac{(z - z_+)^2}{2\sigma_{+z}^2}\right) \dots\dots\dots (S11)$$

$$C_-(r) = A_- e\left(-\frac{(x - x_-)^2}{2\sigma_{-x}^2} - \frac{(y - y_-)^2}{2\sigma_{-y}^2} - \frac{(z - z_-)^2}{2\sigma_{-z}^2}\right) \dots\dots\dots (S12)$$

The normalization factors ( $A_+$  and  $A_-$ ) are used to impose the integrated charge on the centroid to be equal to the corresponding density change integrated in the whole space:

$$A_+ = \frac{\int \rho_+(r) dr}{\int e\left(-\frac{(x - x_+)^2}{2\sigma_{+x}^2} - \frac{(y - y_+)^2}{2\sigma_{+y}^2} - \frac{(z - z_+)^2}{2\sigma_{+z}^2}\right) dr} \dots\dots\dots (S13)$$

$$A_- = \frac{\int \rho_-(r) dr}{\int e\left(-\frac{(x - x_-)^2}{2\sigma_{-x}^2} - \frac{(y - y_-)^2}{2\sigma_{-y}^2} - \frac{(z - z_-)^2}{2\sigma_{-z}^2}\right) dr} \dots\dots\dots (S14)$$

H index is defined as half of the sum of the centroids axis along the D–A direction, if the D–A direction is along the X axis, H is defined by the relation:

$$H = \frac{\sigma_{+x} + \sigma_{-x}}{2} \dots\dots\dots (S15)$$

The centroid along X axis is expected. The t index represents the difference between  $D_{CT}$  and H:

$$t = D_{CT} - H \dots\dots\dots (S16)$$

The integral of hole ( $h^+$ ) and electron ( $e^-$ ) of  $p$ -PPI,  $p$ -CNPPI,  $m$ -PPI and  $m$ -CNPPI with transition density is displayed in Tables S1-S4. The integral overlap of hole-electron (Figure S20-  $p$ -PPI; Figure S21-  $p$ -CNPPI; Figure S22-  $m$ -PPI; Figure S23-  $m$ -CNPPI) distribution (S) is a measure of spatial separation of hole and electron. The integral overlap (S) of hole and electron and distance (D) between centroids of hole and electron confirmed the existence of LE and CT states. Compared to parent compounds, the cyano derivatives has high  $D_{ave}$  and  $S_{ave}$  value, indicates charge transfer is higher in percentage. The variation of dipolemoment with respect to  $S_0$  is outputted which is directly evaluated based on the position of centroid of hole and electron. The RMSD of hole or electron characterizes their distribution breadth: RMSD of both electron and hole in  $p$ -PPI,  $m$ -PPI and  $m$ -CNPPI (Tables S5, S7 & S8) is higher in X direction, indicates electron and hole distribution is much broader in X direction whereas RMSD of hole and electron in  $p$ -CNPPI (Table S6) is higher in y-direction. The H index (half sum of the axis of anisotropic density variation distribution) measures the spread of positive and negative regions related to CT. The CT index, *i.e.*,  $t$  index ( $D_{CT}$  - H index) is another measure of separation of hole-electron (equations S15 and S16; Tables S5- S8). The  $t$  is negative in all directions which reveal that the overlap of hole and electron is very severe which supports the hybridization. This is further evidenced by  $\Delta r$  index (equation S1: Tables S9-S12) which is average of hole -electron distance ( $d_{h^+ \cdot e^-}$ ) upon excitation which shows the nature of excitation type, LE or CT: valence excitation (LE) is related to short distance ( $< d_{h^+ \cdot e^-}$ ) while the larger distance ( $> d_{h^+ \cdot e^-}$ ) is related to CT excitation. The triplet exciton is transformed to singlet exciton through RISC process with high energy excited state (hot CT channel) [1] which is beneficial for triplet exciton conversion in electroluminescence process without any delayed fluorescence. The CT excitons are formed with weak binding energy ( $E_b$ ) on higher excited states, [2] as a result; the exciton utilization ( $\eta_s$ ) can be harvested like phosphorescent materials. The enhanced LE component and hybridization between LE and CT components results high  $\eta_{PL}$  and

high  $\eta_s$ . The coexisting LE/CT composition harvested high  $\eta_{PL}$  and high  $\eta_s$  and enhanced OLEDs efficiencies.

**Figure S13.** Potential energy surface scan (PES) diagram.

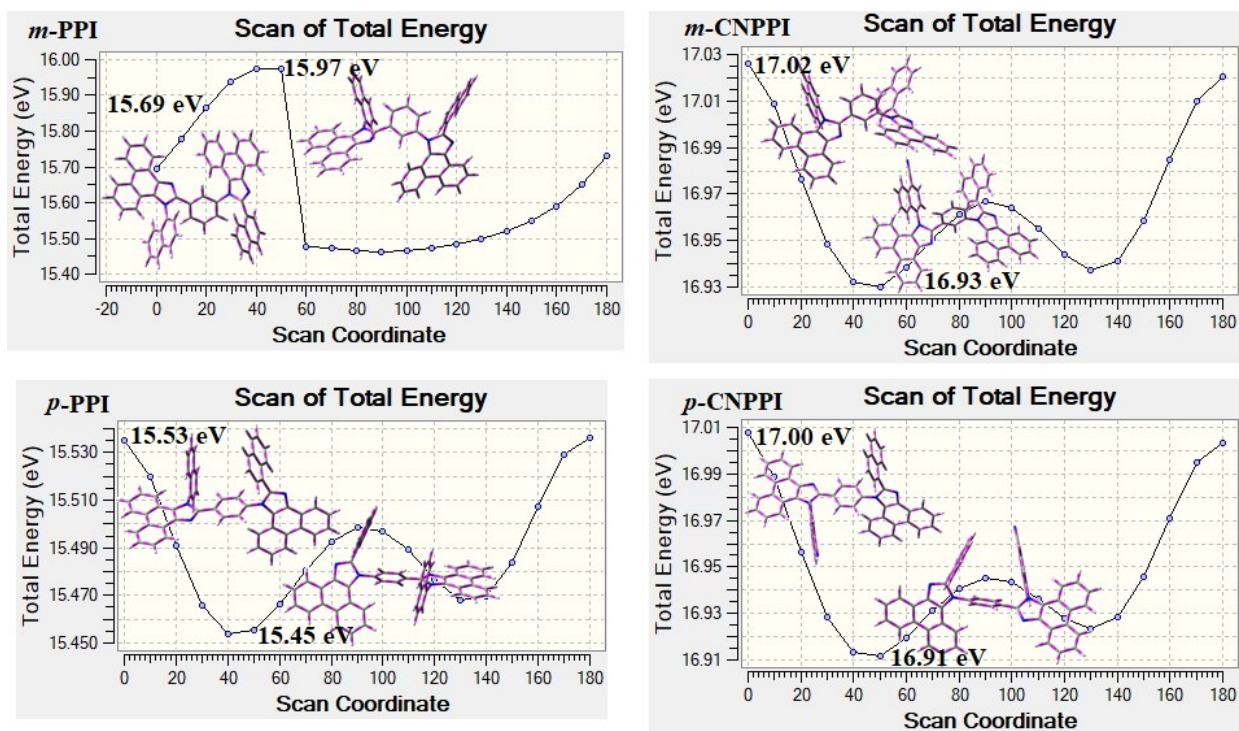

**Figure S14.** Natural transition orbital pairs (HONTOs and LUNTOs) with transition character for singlet states of *p*-CNPPI [*f*-oscillator strength and % weights of hole-particle].



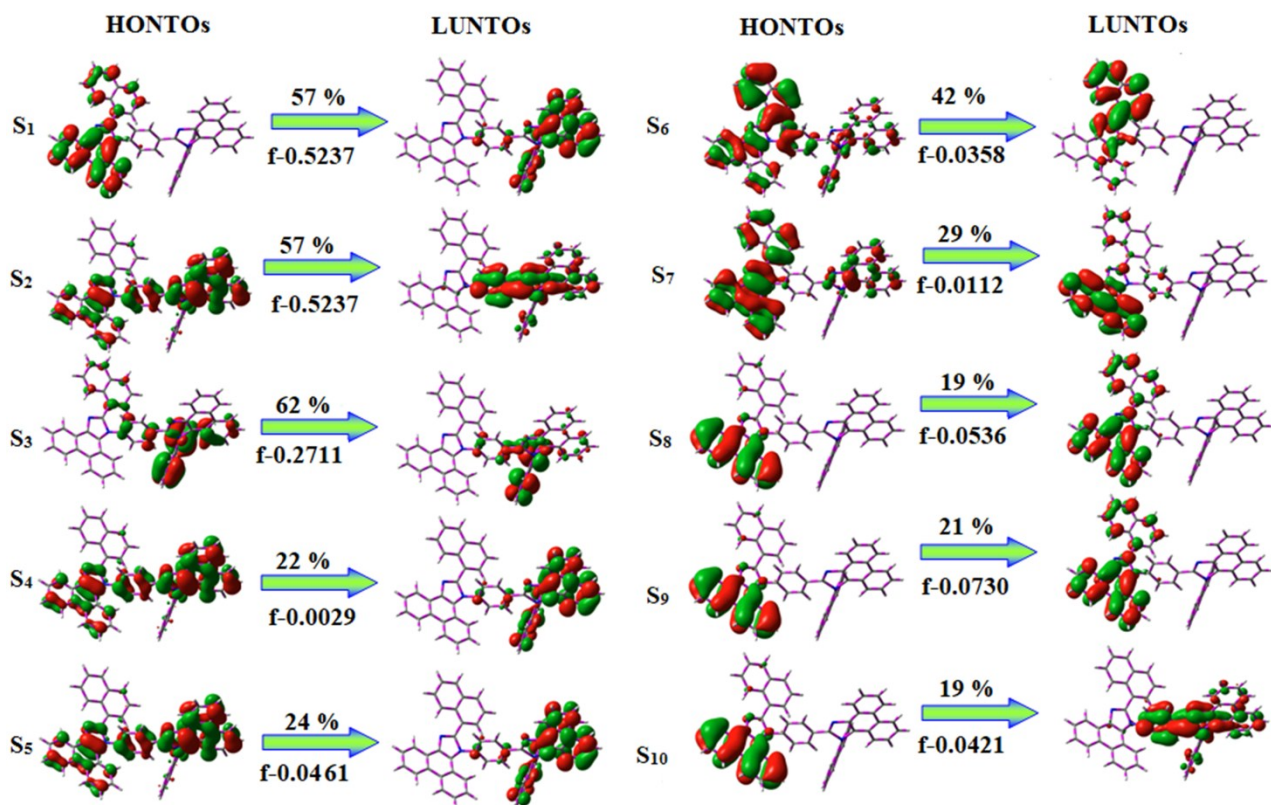

**Figure S15.** Natural transition orbital pairs(HONTOs and LUNTOs) with transition character for singlet states of *p*-PPI [*f*-oscillator strength and % weights of hole-particle].

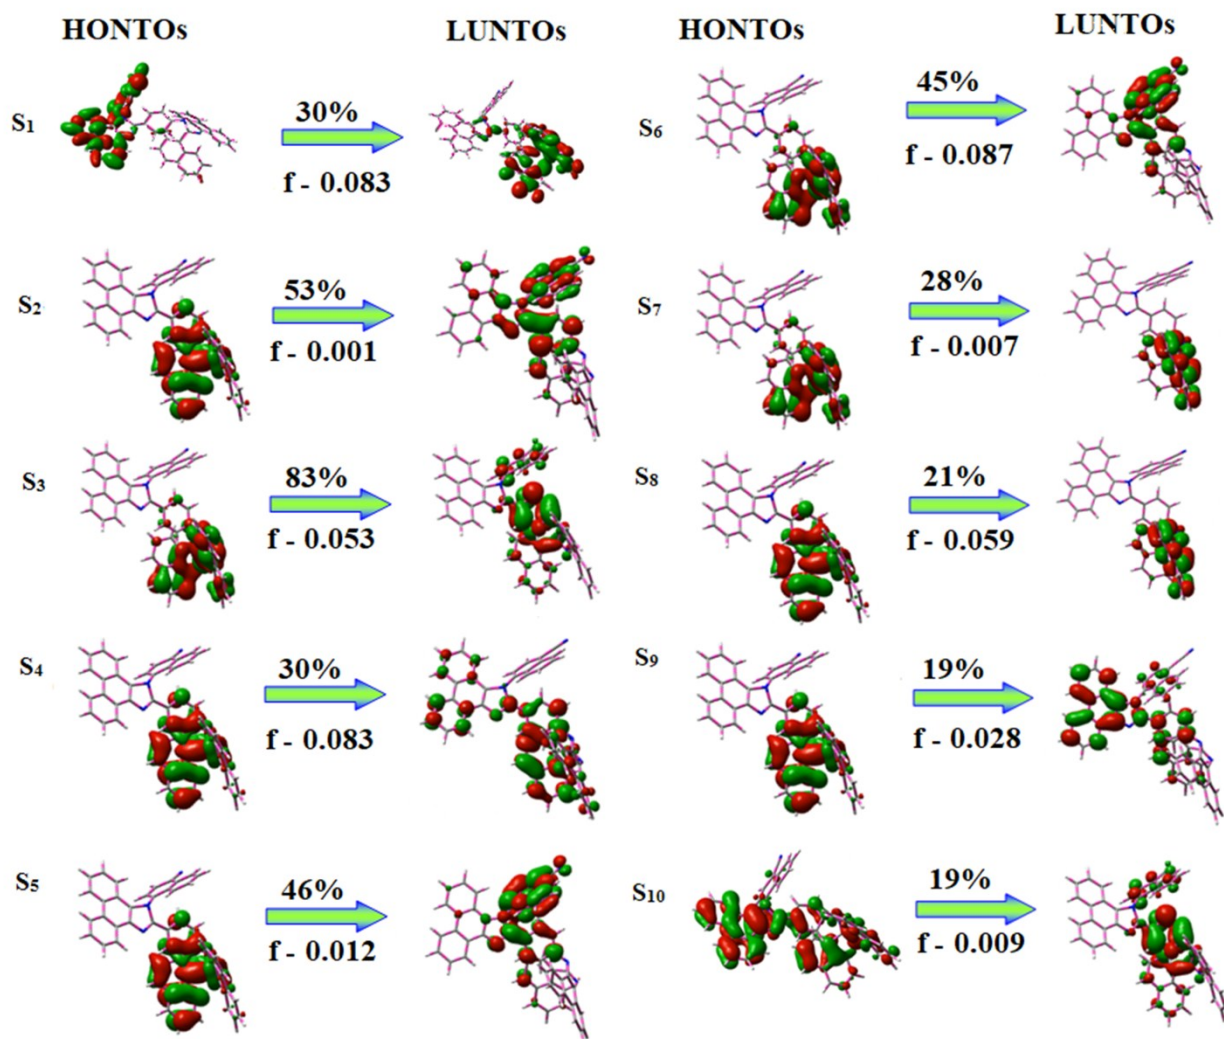

**Figure S16.** Natural transition orbital pairs (HONTOs & LUNTOs) with transition character for singlet states of *m*-PPI [*f*-oscillator strength and % weights of hole-particle].

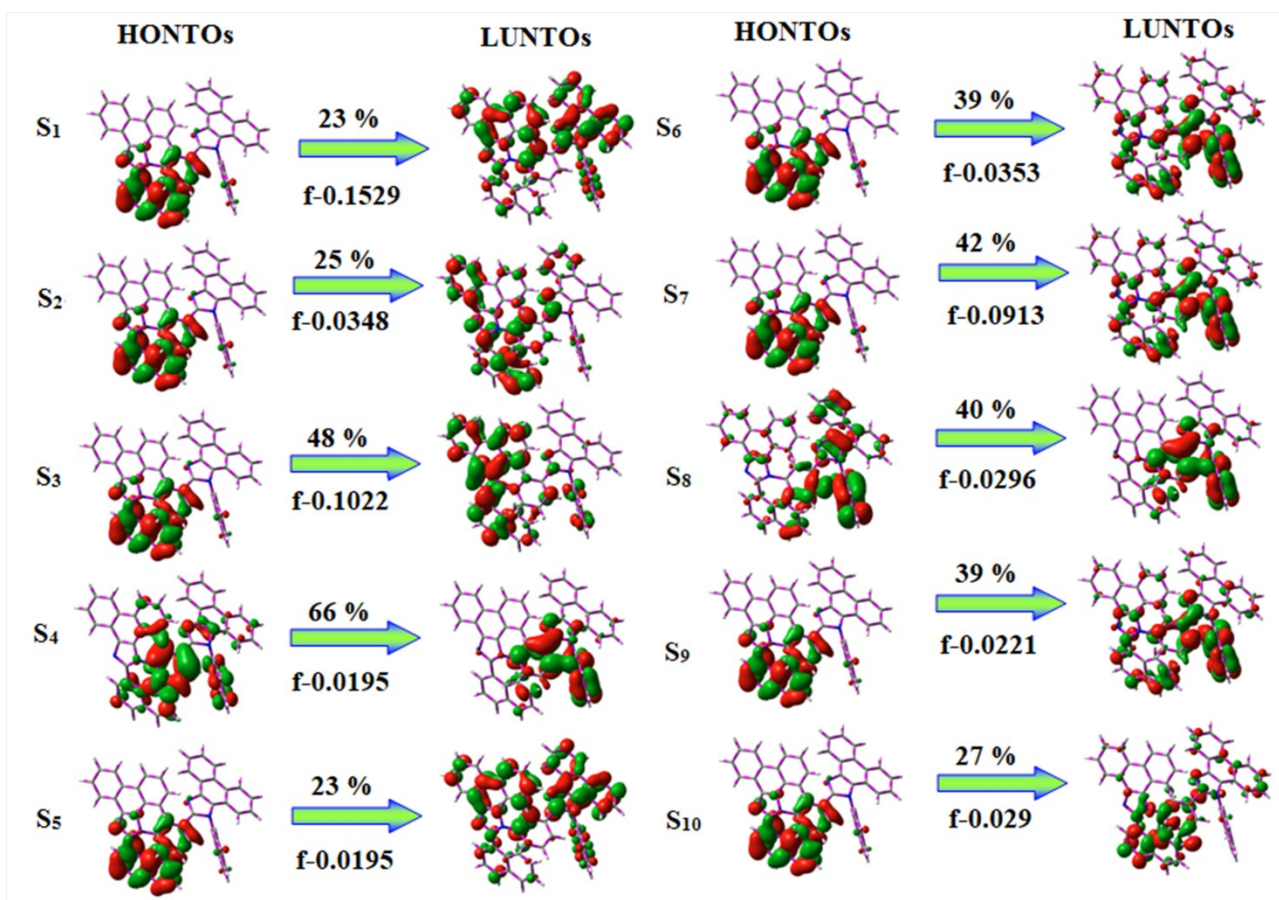

**Figure S17.** Natural transition orbital pairs (HONTOs & LUNTOs) with transition character for singlet states of *m*-CNPPI [*f*-oscillator strength and % weights of hole-particle].

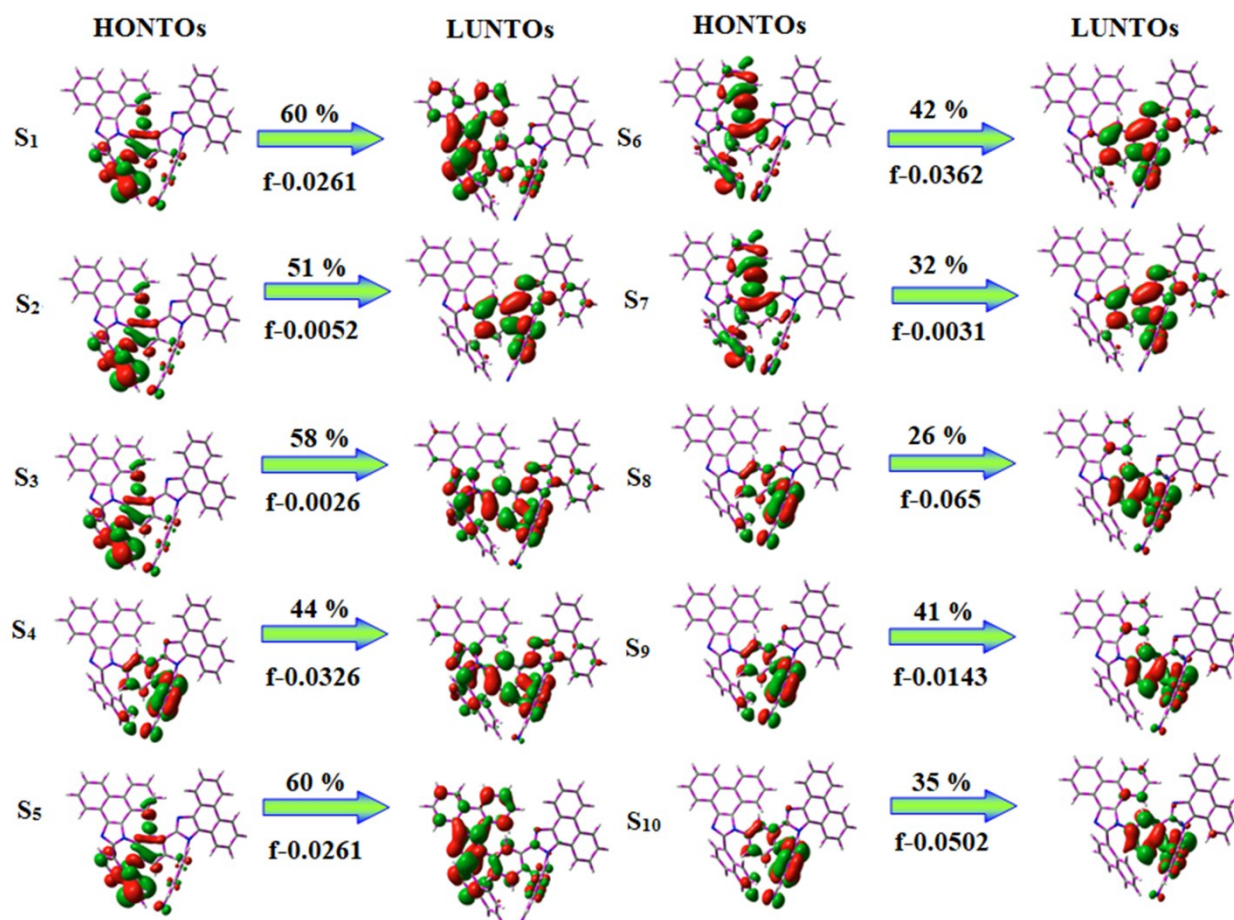

**Figure S18.** Solvatochromic absorption of (a) *p*-PPI, (b) *p*-CNPPI, (c) *m*-PPI and (d) *m*-CNPPI.

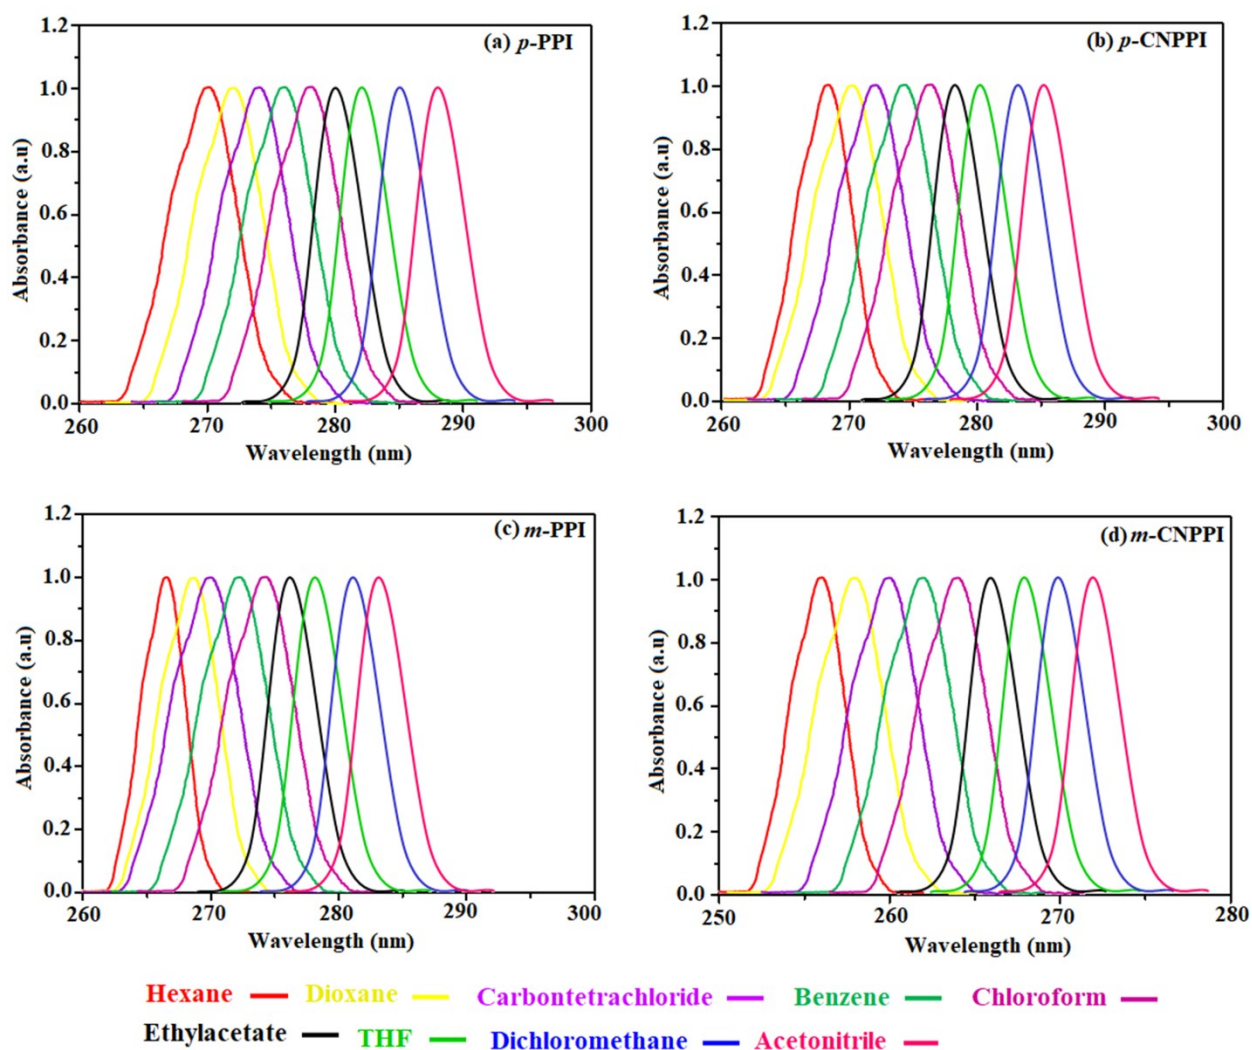

**Figure S19.** Normalized solvatochromic emission spectra of (a) *p*-PPI, (b) *p*-CNPPI, (c) *m*-PPI and (d) *m*-CNPPI.

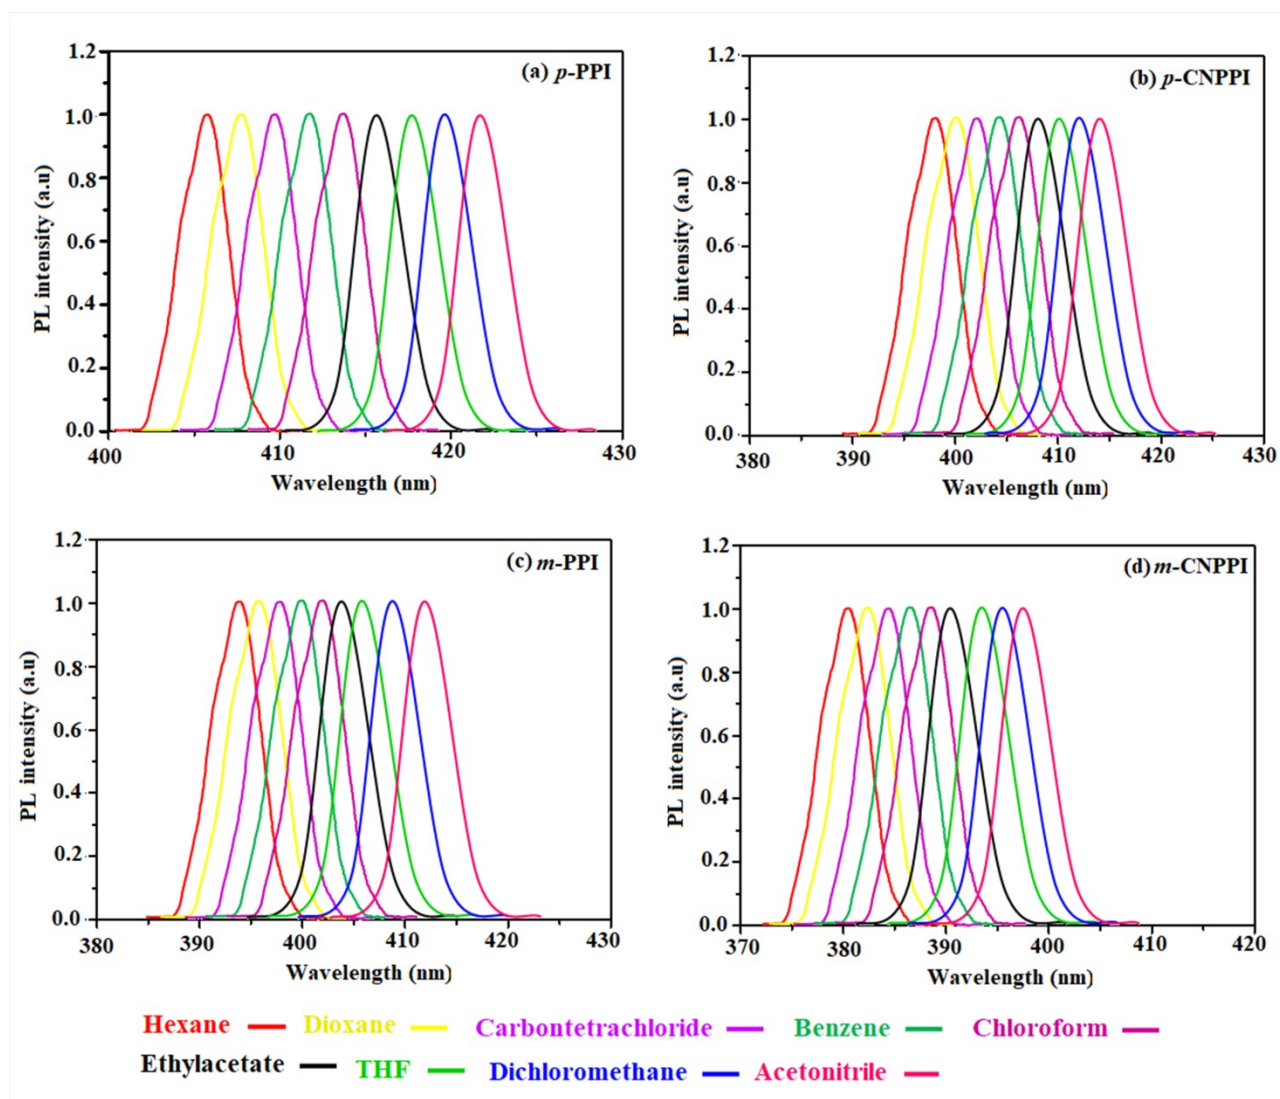

**Figure S20.** Hole and particle electron density distribution [green increasing and blue decreasing electron density and Transition density matrices (TDM) plot of *p*-PPI.

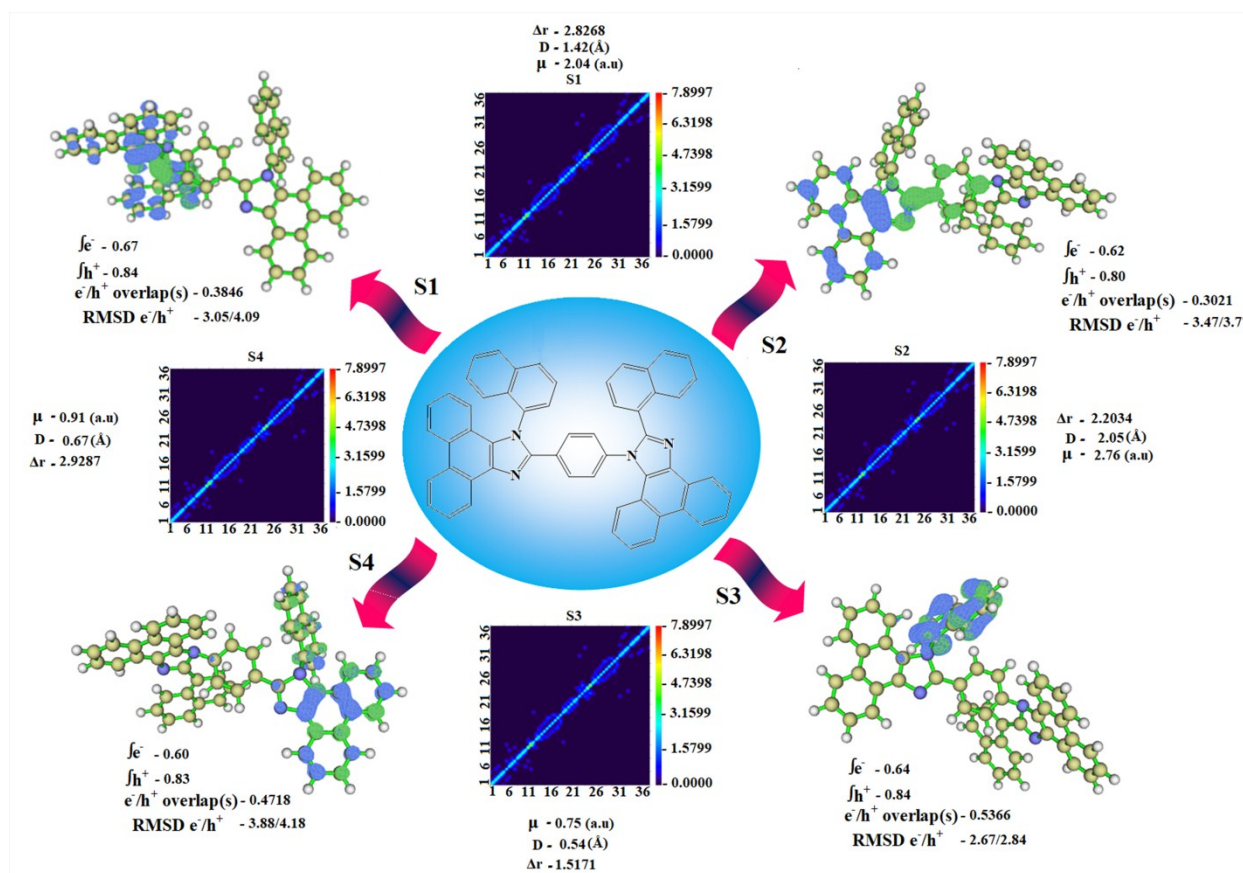

**Figure S21.** Hole and particle electron density distribution [green increasing and blue decreasing electron density and Transition density matrices (TDM) plot of *p*-CNPPI.

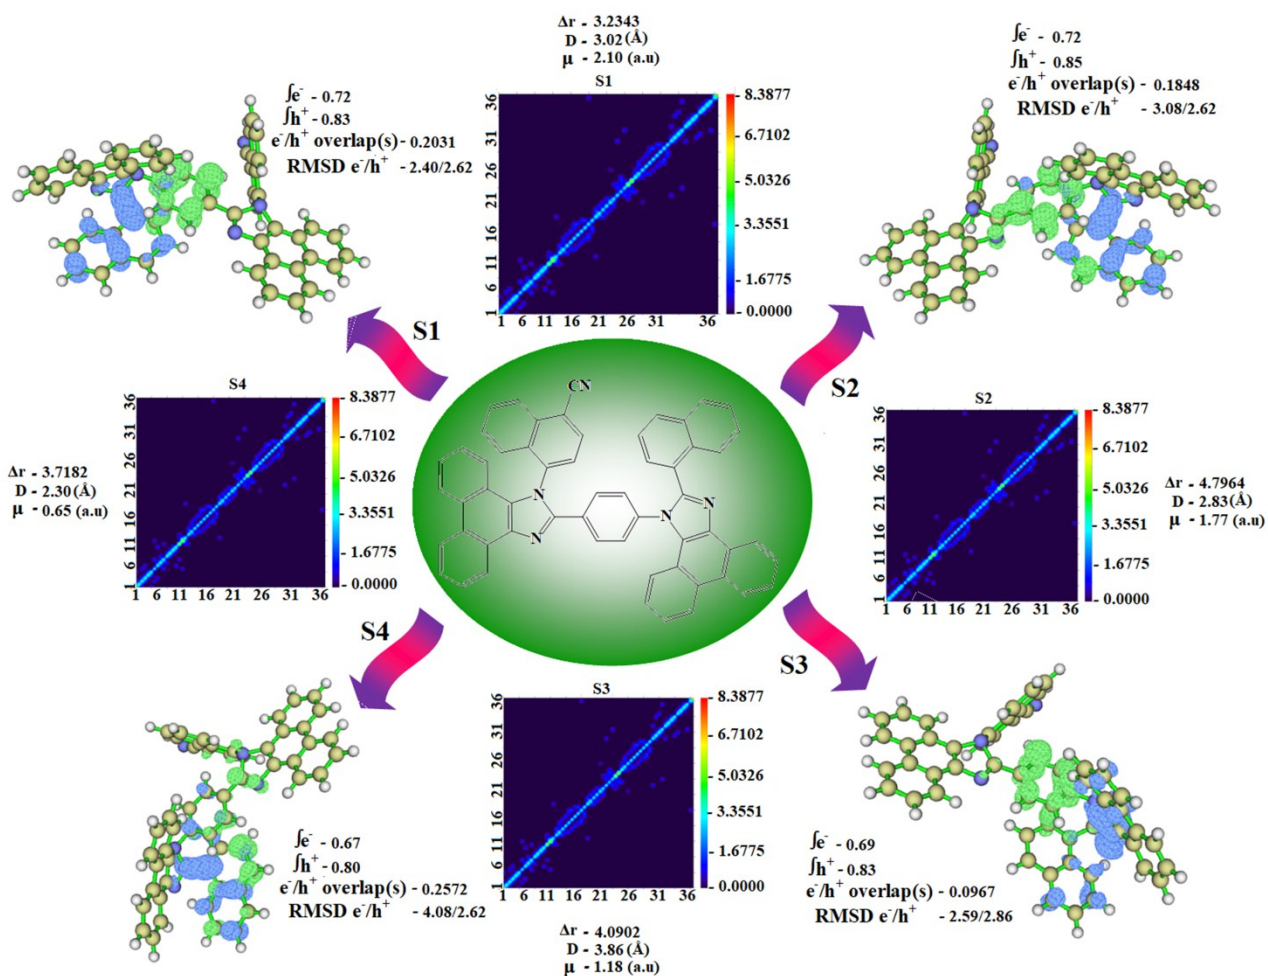



**Figure S22.** Hole and particle electron density distribution [green increasing and blue decreasing electron density and Transition density matrices (TDM) plot of *m*-PPI.

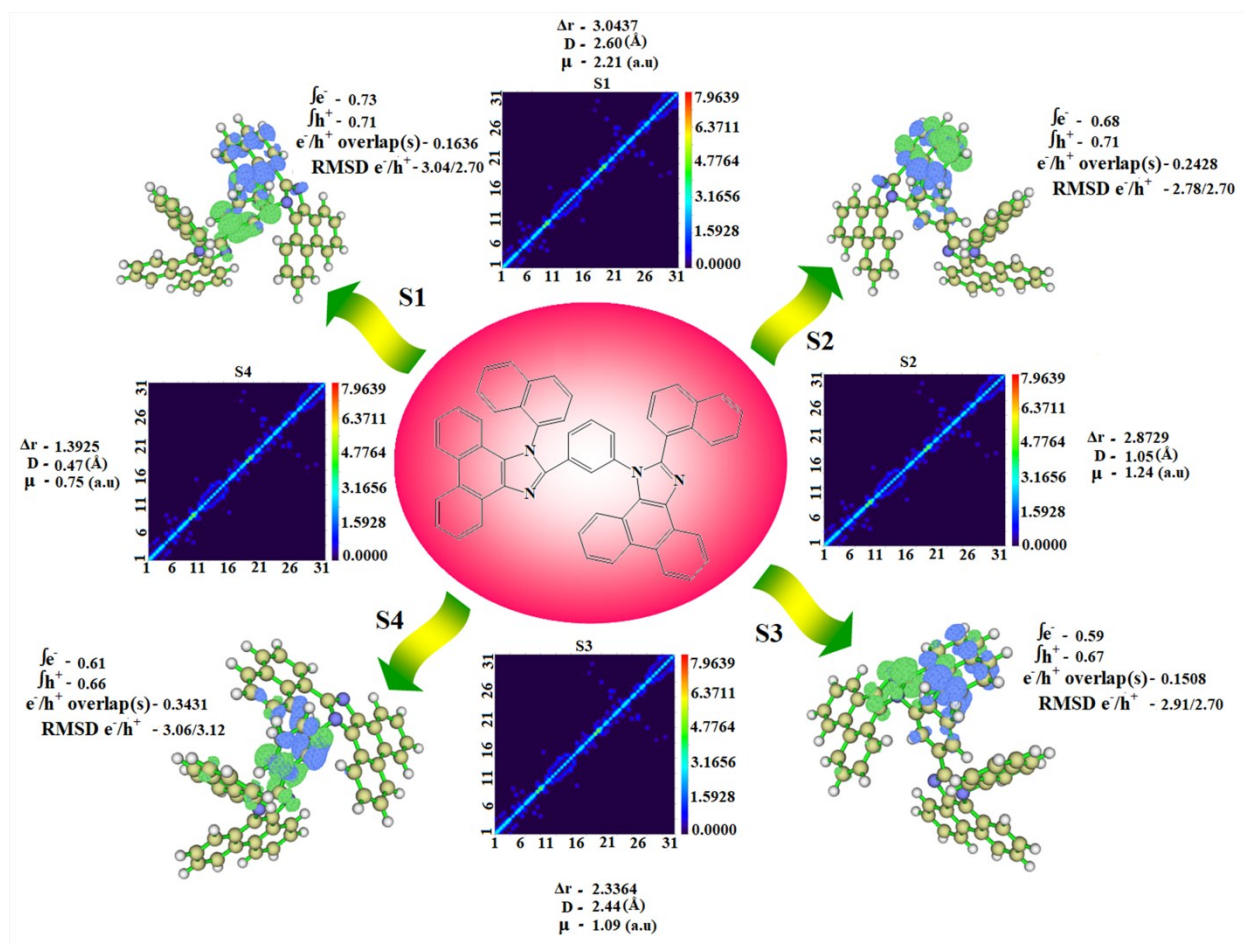

**Figure S23.** Hole and particle electron density distribution [green increasing and blue decreasing electron density and Transition density matrices (TDM) plot of *m*-CNPPI.

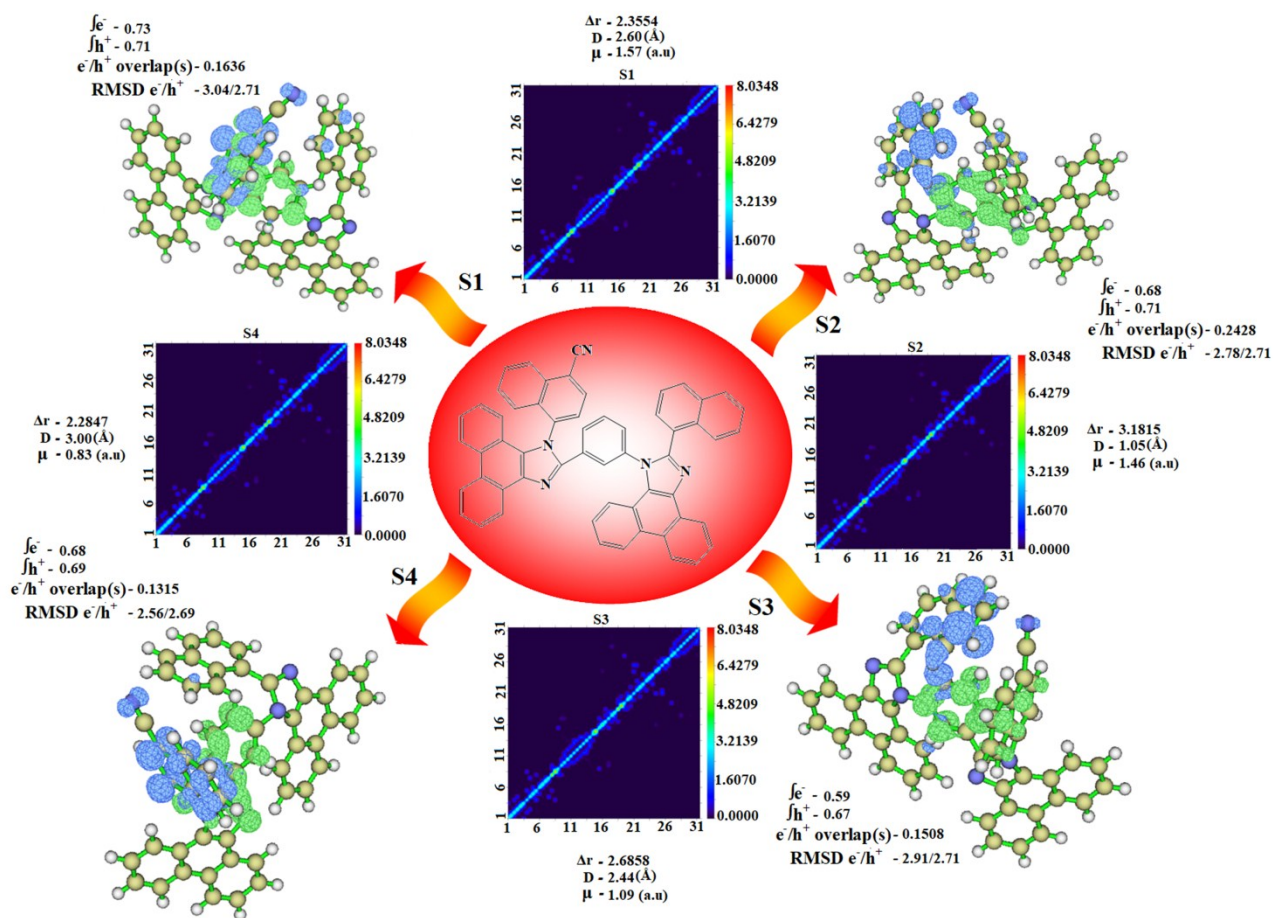

**Table S1.** Hole and electron overlap (S), distance between centroids of hole and electron (D, Å) and dipole moment ( $\mu$ ) of *p*-PPI.

| State | Hole integral | Electron integral | Integral of transition density | Integral overlap of $h^+ - e^-$ (S) | Centroid of hole (Å) |       |       | Centroid of electron (Å) |       |       | D (Å) | $\mu$ (a.u) |
|-------|---------------|-------------------|--------------------------------|-------------------------------------|----------------------|-------|-------|--------------------------|-------|-------|-------|-------------|
|       |               |                   |                                |                                     | x                    | y     | z     | x                        | y     | z     |       |             |
| S1    | 0.8448        | 0.6681            | -0.0138                        | 0.3846                              | -4.03                | 0.94  | -0.35 | -3.37                    | 1.96  | -1.10 | 1.42  | 2.04        |
| S2    | 0.8033        | 0.6193            | -0.0104                        | 0.3021                              | 4.32                 | 0.46  | 1.09  | 2.35                     | 0.07  | 0.68  | 2.05  | 2.76        |
| S3    | 0.8418        | 0.6426            | -0.0126                        | 0.5366                              | 3.31                 | -1.79 | -1.89 | 3.07                     | -2.19 | -2.15 | 0.54  | 0.75        |
| S4    | 0.8316        | 0.5998            | 0.0019                         | 0.4718                              | 4.33                 | -0.01 | 0.38  | 4.94                     | -0.20 | 0.15  | 0.67  | 0.91        |
| S5    | 0.7754        | 0.5503            | 0.0034                         | 0.3893                              | 2.59                 | -1.15 | -1.45 | 2.94                     | -1.30 | -1.64 | 0.42  | 0.53        |
| S6    | 0.6535        | 0.4962            | -0.0069                        | 0.3060                              | -3.51                | 1.41  | -0.40 | -3.53                    | 2.27  | -1.09 | 1.10  | 1.19        |
| S7    | 0.8017        | 0.5768            | 0.0007                         | 0.4640                              | -4.78                | -1.26 | 0.78  | -4.86                    | -1.71 | 0.98  | 0.49  | 0.64        |
| S8    | 0.7583        | 0.5411            | -0.0049                        | 0.3914                              | -3.33                | 2.45  | -1.01 | -3.34                    | 2.05  | -0.93 | 0.40  | 0.49        |
| S9    | 0.5785        | 0.4430            | -0.0002                        | 0.2819                              | 0.29                 | 0.13  | 0.13  | 0.15                     | 0.76  | 0.08  | 0.64  | 0.62        |
| S10   | 0.5717        | 0.4406            | 0.0092                         | 0.2319                              | -0.33                | -0.11 | -0.55 | -0.74                    | 0.73  | -0.19 | 1.01  | 0.96        |

**Table S2.** Hole and electron overlap (S), distance between centroids of hole and electron (D, Å) and dipole moment ( $\mu$ ) of *p*-CNPPI.

| State | Hole integral | Electron integral | Integral of transition density | Integral overlap of $h^+ - e^-$ (S) | Centroid of hole (Å) |       |       | Centroid of electron (Å) |       |       | D (Å) | $\mu$ (a.u) |
|-------|---------------|-------------------|--------------------------------|-------------------------------------|----------------------|-------|-------|--------------------------|-------|-------|-------|-------------|
|       |               |                   |                                |                                     | x                    | y     | z     | x                        | y     | z     |       |             |
| S1    | 0.8261        | 0.7236            | -0.0074                        | 0.2031                              | 3.32                 | -0.12 | -1.90 | 0.84                     | 1.01  | -0.60 | 3.02  | 4.43        |
| S2    | 0.8529        | 0.7231            | 0.0234                         | 0.1848                              | 3.32                 | -0.12 | -1.90 | 0.70                     | -0.04 | -0.84 | 2.83  | 4.21        |
| S3    | 0.8260        | 0.6977            | -0.0086                        | 0.0967                              | 4.55                 | 0.32  | -0.50 | 0.75                     | 0.98  | -0.60 | 3.86  | 5.56        |
| S4    | 0.8027        | 0.6706            | 0.0129                         | 0.2572                              | 3.32                 | -0.12 | -1.90 | 1.07                     | -0.14 | -1.40 | 2.30  | 3.20        |
| S5    | 0.8750        | 0.7721            | -0.0082                        | 0.0860                              | 3.27                 | -0.12 | -1.93 | -2.53                    | 2.77  | -0.14 | 6.73  | 10.47       |
| S6    | 0.8475        | 0.6972            | 0.0118                         | 0.1176                              | 4.59                 | 0.32  | -0.49 | 0.63                     | 0.01  | -0.25 | 3.98  | 5.81        |
| S7    | 0.7715        | 0.6146            | -0.0098                        | 0.2776                              | 4.32                 | 0.19  | -0.85 | 4.25                     | -0.05 | 0.73  | 1.60  | 2.10        |
| S8    | 0.6699        | 0.5298            | 0.0020                         | 0.2218                              | 3.41                 | -0.08 | -1.50 | 4.16                     | 0.16  | 0.54  | 2.19  | 2.48        |
| S9    | 0.7631        | 0.5848            | -0.0082                        | 0.1586                              | 3.21                 | -0.31 | -1.88 | -0.66                    | 0.53  | -0.13 | 4.34  | 5.52        |
| S10   | 0.7903        | 0.6017            | -0.0006                        | 0.2226                              | 2.8                  | -0.44 | -1.96 | 0.88                     | 0.84  | -0.29 | 2.85  | 3.75        |

**Table S3.** Hole and electron overlap (S), distance between centroids of hole and electron (D, Å) and dipole moment ( $\mu$ ) of *m*-PPI.

| State | Hole integral | Electron integral | Integral of transition density | Integral overlap of $h^+$ - $e^-$ (S) | Centroid of hole (Å) |       |       | Centroid of electron (Å) |       |       | D (Å) | $\mu$ (a.u) |
|-------|---------------|-------------------|--------------------------------|---------------------------------------|----------------------|-------|-------|--------------------------|-------|-------|-------|-------------|
|       |               |                   |                                |                                       | x                    | y     | z     | x                        | y     | z     |       |             |
| S1    | 0.7145        | 0.7318            | -0.0015                        | 0.1636                                | -1.87                | -3.16 | -0.66 | -0.38                    | -1.50 | 0.66  | 2.60  | 3.54        |
| S2    | 0.7061        | 0.6828            | -0.0009                        | 0.2428                                | -1.87                | -3.16 | -0.66 | -1.60                    | -3.97 | -1.27 | 1.05  | 1.37        |
| S3    | 0.6702        | 0.5943            | -0.0909                        | 0.1508                                | -1.87                | -3.16 | -0.66 | -3.37                    | -1.24 | -0.49 | 2.44  | 2.91        |
| S4    | 0.6603        | 0.6071            | 0.0261                         | 0.3431                                | -0.28                | -1.44 | 0.71  | 0.13                     | -1.28 | 0.86  | 0.47  | 0.56        |
| S5    | 0.6725        | 0.6138            | -0.0100                        | 0.1090                                | -1.87                | -3.16 | -0.66 | 1.15                     | -1.35 | 0.74  | 3.79  | 4.61        |
| S6    | 0.6516        | 0.6223            | -0.0150                        | 0.1068                                | -1.87                | -3.16 | -0.66 | 2.31                     | -1.99 | 0.46  | 4.48  | 5.39        |
| S7    | 0.6658        | 0.5075            | 0.0390                         | 0.1979                                | -1.26                | -3.01 | -0.37 | -0.74                    | -0.99 | 0.53  | 2.27  | 2.52        |
| S8    | 0.7924        | 0.6529            | -0.0082                        | 0.2940                                | 1.97                 | -2.51 | 1.13  | 1.18                     | -1.64 | 0.88  | 1.20  | 1.64        |
| S9    | 0.6298        | 0.5822            | 0.0047                         | 0.0856                                | -1.74                | -3.02 | -0.55 | 0.72                     | -0.97 | 0.60  | 3.40  | 3.90        |
| S10   | 0.5923        | 0.4618            | -0.0128                        | 0.1547                                | -1.87                | -3.16 | -0.66 | -0.89                    | -1.57 | -0.21 | 1.92  | 1.91        |

**Table S4.** Hole and electron overlap (S), distance between centroids of hole and electron (D, Å) and dipole moment ( $\mu$ ) of *m*-CNPPI.

| State | Hole integral | Electron integral | Integral of transition density | Integral overlap of $h^+ - e^-$ (S) | Centroid of hole (Å) |       |       | Centroid of electron (Å) |       |       | D (Å) | $\mu$ (a.u) |
|-------|---------------|-------------------|--------------------------------|-------------------------------------|----------------------|-------|-------|--------------------------|-------|-------|-------|-------------|
|       |               |                   |                                |                                     | x                    | y     | z     | x                        | y     | z     |       |             |
| S1    | 0.7145        | 0.7318            | -0.0015                        | 0.1636                              | -1.87                | -3.16 | -0.66 | -0.38                    | -1.50 | 0.66  | 2.60  | 3.55        |
| S2    | 0.7061        | 0.6828            | -0.0009                        | 0.2428                              | -1.87                | -3.16 | -0.66 | -1.60                    | -3.97 | -1.27 | 1.05  | 1.37        |
| S3    | 0.6701        | 0.5943            | -0.0909                        | 0.1508                              | -1.87                | -3.16 | -0.66 | -3.37                    | -1.24 | -0.49 | 2.44  | 2.91        |
| S4    | 0.6929        | 0.6839            | -0.0548                        | 0.1315                              | -1.94                | -3.69 | -0.30 | -3.90                    | -1.48 | -0.78 | 3.00  | 3.90        |
| S5    | 0.5851        | 0.5941            | 0.0534                         | 0.1407                              | -0.80                | -0.26 | 0.29  | 0.40                     | -0.50 | 0.74  | 1.31  | 1.46        |
| S6    | 0.5851        | 0.5941            | 0.0534                         | 0.1407                              | -0.80                | -0.26 | 0.29  | 0.40                     | -0.50 | 0.74  | 1.31  | 1.46        |
| S7    | 0.6456        | 0.5890            | -0.0065                        | 0.1906                              | -0.02                | -1.22 | 0.45  | 0.37                     | -1.38 | 0.83  | 0.57  | 0.66        |
| S8    | 0.5364        | 0.4103            | 0.0765                         | 0.1654                              | -1.59                | -3.04 | -0.13 | -1.78                    | -1.97 | -0.18 | 1.08  | 0.97        |
| S9    | 0.6138        | 0.5252            | -0.0002                        | 0.1692                              | 0.56                 | -2.08 | 0.44  | -0.30                    | -0.71 | 0.51  | 1.62  | 1.74        |
| S10   | 0.5402        | 0.5427            | 0.0350                         | 0.1341                              | -1.16                | -1.15 | 0.23  | -2.22                    | 1.35  | -0.15 | 2.74  | 2.80        |

**Table S5.** Computed RMSD of electron and hole, H index and t index of *p*-PPI.

| State | RMSD (Electron) |       |       |       | RMSD (Hole) |       |       |       | H index |       |       |       | t index |        |        |       |
|-------|-----------------|-------|-------|-------|-------------|-------|-------|-------|---------|-------|-------|-------|---------|--------|--------|-------|
|       | x               | y     | z     | total | x           | y     | z     | total | x       | y     | z     | Total | x       | y      | z      | Total |
| S1    | 1.609           | 2.302 | 1.194 | 3.052 | 2.199       | 3.060 | 1.586 | 4.089 | 1.904   | 2.681 | 1.390 | 3.570 | -1.249  | -1.662 | -0.638 | 2.175 |
| S2    | 3.029           | 1.133 | 1.270 | 3.475 | 3.073       | 1.438 | 1.645 | 3.771 | 3.051   | 1.285 | 1.458 | 3.618 | -1.080  | -0.900 | -1.044 | 1.751 |
| S3    | 1.321           | 1.746 | 1.530 | 2.671 | 1.383       | 1.777 | 1.737 | 2.844 | 1.352   | 1.761 | 1.634 | 2.757 | -1.113  | -1.360 | -1.371 | 2.229 |
| S4    | 2.353           | 2.085 | 2.280 | 3.883 | 3.045       | 1.892 | 2.146 | 4.178 | 2.699   | 1.988 | 2.213 | 4.017 | -2.096  | -1.799 | -1.981 | 3.399 |
| S5    | 2.702           | 2.483 | 1.830 | 4.101 | 3.033       | 2.383 | 1.936 | 4.315 | 2.867   | 2.433 | 1.883 | 4.206 | -2.517  | -2.285 | -1.699 | 3.800 |
| S6    | 1.779           | 2.515 | 1.314 | 3.349 | 2.645       | 2.978 | 1.531 | 4.267 | 2.212   | 2.747 | 1.423 | 3.803 | -2.201  | -1.891 | -0.735 | 2.994 |
| S7    | 2.376           | 2.118 | 1.228 | 3.411 | 2.704       | 2.130 | 1.335 | 3.692 | 2.540   | 2.124 | 1.282 | 3.550 | -2.460  | -1.678 | -1.081 | 3.168 |
| S8    | 2.388           | 2.745 | 1.490 | 3.931 | 2.426       | 2.788 | 1.421 | 3.960 | 2.407   | 2.766 | 1.455 | 3.945 | -2.393  | -2.375 | -1.373 | 3.640 |
| S9    | 4.676           | 2.243 | 1.845 | 5.505 | 5.030       | 2.241 | 1.815 | 5.799 | 4.853   | 2.242 | 1.830 | 5.651 | -4.716  | -1.615 | -1.778 | 5.292 |
| S10   | 4.034           | 2.200 | 1.644 | 4.881 | 4.575       | 2.473 | 1.803 | 5.505 | 4.305   | 2.336 | 1.724 | 5.192 | -3.889  | -1.493 | -1.358 | 4.381 |

**Table S6.** Computed RMSD of electron and hole, H index and t index of *p*-CNPPI.

| State | RMSD (Electron) |       |       |       | RMSD (Hole) |       |       |       | H index |       |       |       | t index |        |        |       |
|-------|-----------------|-------|-------|-------|-------------|-------|-------|-------|---------|-------|-------|-------|---------|--------|--------|-------|
|       | x               | y     | z     | total | x           | y     | z     | total | x       | y     | z     | Total | x       | y      | z      | Total |
| S1    | 1.742           | 1.236 | 1.095 | 2.400 | 1.687       | 1.334 | 1.501 | 2.623 | 1.714   | 1.285 | 1.298 | 2.505 | 0.770   | -0.154 | 0.002  | 0.785 |
| S2    | 2.240           | 1.561 | 1.431 | 3.083 | 1.687       | 1.334 | 1.501 | 2.623 | 1.964   | 1.448 | 1.466 | 2.846 | 0.656   | -1.367 | -0.404 | 1.569 |
| S3    | 1.935           | 1.301 | 1.132 | 2.592 | 1.425       | 1.261 | 2.135 | 2.860 | 1.680   | 1.281 | 1.633 | 2.671 | 2.122   | -0.624 | -1.534 | 2.691 |
| S4    | 3.149           | 1.926 | 1.750 | 4.085 | 1.687       | 1.334 | 1.501 | 2.623 | 2.418   | 1.630 | 1.625 | 3.339 | -0.171  | -1.612 | -1.123 | 1.972 |
| S5    | 2.231           | 2.038 | 1.724 | 3.480 | 1.704       | 1.345 | 1.454 | 2.613 | 1.968   | 1.692 | 1.589 | 3.043 | 3.835   | 1.206  | 0.204  | 4.025 |
| S6    | 2.620           | 1.442 | 1.493 | 3.343 | 1.352       | 1.245 | 2.153 | 2.831 | 1.986   | 1.343 | 1.823 | 3.012 | 1.980   | -1.037 | -1.580 | 2.737 |
| S7    | 2.958           | 1.239 | 1.936 | 3.746 | 1.450       | 1.256 | 2.130 | 2.866 | 2.204   | 1.247 | 2.033 | 3.247 | -2.137  | -1.007 | -0.448 | 2.405 |
| S8    | 2.960           | 1.354 | 1.879 | 3.758 | 2.017       | 1.358 | 1.807 | 3.030 | 2.488   | 1.356 | 1.843 | 3.380 | -1.748  | -1.113 | 0.205  | 2.083 |
| S9    | 3.020           | 1.786 | 1.167 | 3.698 | 1.944       | 1.365 | 1.621 | 2.876 | 2.482   | 1.576 | 1.394 | 3.254 | 1.392   | -0.728 | 0.363  | 1.612 |
| S10   | 2.659           | 1.535 | 1.529 | 3.430 | 2.414       | 1.348 | 1.547 | 3.168 | 2.537   | 1.442 | 1.538 | 3.298 | -0.622  | -0.156 | 0.139  | 0.656 |



**Table S7.** Computed RMSD of electron and hole, H index and t index of *m*-PPI.

| State | RMSD (Electron) |       |       |       | RMSD (Hole) |       |       |       | H index |       |       |       | t index |        |        |       |
|-------|-----------------|-------|-------|-------|-------------|-------|-------|-------|---------|-------|-------|-------|---------|--------|--------|-------|
|       | x               | y     | z     | total | x           | y     | z     | total | x       | y     | z     | Total | x       | y      | z      | Total |
| S1    | 2.056           | 1.887 | 1.217 | 3.044 | 1.566       | 1.480 | 1.640 | 2.707 | 1.811   | 1.683 | 1.428 | 2.855 | -0.317  | -0.022 | -0.103 | 0.334 |
| S2    | 1.673           | 1.545 | 1.600 | 2.784 | 1.566       | 1.480 | 1.640 | 2.707 | 1.619   | 1.512 | 1.620 | 2.745 | -1.354  | -0.697 | -1.019 | 1.833 |
| S3    | 1.588           | 1.920 | 1.508 | 2.912 | 1.566       | 1.480 | 1.640 | 2.707 | 1.577   | 1.700 | 1.574 | 2.802 | -0.080  | 0.217  | -1.404 | 1.423 |
| S4    | 2.168           | 1.861 | 1.110 | 3.065 | 2.167       | 1.859 | 1.257 | 3.120 | 2.168   | 1.860 | 1.184 | 3.092 | -1.752  | -1.698 | -1.037 | 2.652 |
| S5    | 2.736           | 2.133 | 1.428 | 3.752 | 1.566       | 1.480 | 1.640 | 2.707 | 2.151   | 1.806 | 1.534 | 3.200 | 0.867   | 0.004  | -0.123 | 0.876 |
| S6    | 2.482           | 2.004 | 1.549 | 3.546 | 1.566       | 1.480 | 1.640 | 2.707 | 2.024   | 1.742 | 1.595 | 3.110 | 2.156   | -0.577 | -0.470 | 2.280 |
| S7    | 3.380           | 2.619 | 1.621 | 4.573 | 2.244       | 1.611 | 1.753 | 3.272 | 2.812   | 2.115 | 1.687 | 3.902 | -2.294  | -0.092 | -0.789 | 2.427 |
| S8    | 2.444           | 1.923 | 1.357 | 3.393 | 2.211       | 1.621 | 1.517 | 3.134 | 2.328   | 1.772 | 1.437 | 3.259 | -1.538  | -0.904 | -1.184 | 2.141 |
| S9    | 3.809           | 2.604 | 1.743 | 4.933 | 1.666       | 1.586 | 1.650 | 2.831 | 2.738   | 2.095 | 1.697 | 3.842 | -0.277  | -0.044 | -0.544 | 0.612 |
| S10   | 3.202           | 2.584 | 1.981 | 4.566 | 1.566       | 1.480 | 1.640 | 2.707 | 2.384   | 2.032 | 1.810 | 3.618 | -1.408  | -0.443 | -1.359 | 2.007 |

**Table S8.** Computed RMSD of electron and hole, H index and t index of *m*-CNPPI.

| State | RMSD (Electron) |       |       |       | RMSD (Hole) |       |       |       | H index |       |       |       | t index |        |        |       |
|-------|-----------------|-------|-------|-------|-------------|-------|-------|-------|---------|-------|-------|-------|---------|--------|--------|-------|
|       | x               | y     | z     | total | x           | y     | z     | total | x       | y     | z     | Total | x       | y      | z      | Total |
| S1    | 2.056           | 1.887 | 1.217 | 3.044 | 1.566       | 1.480 | 1.640 | 2.707 | 1.811   | 1.683 | 1.428 | 2.855 | -0.317  | -0.022 | -0.103 | 0.334 |
| S2    | 1.673           | 1.545 | 1.600 | 2.784 | 1.566       | 1.480 | 1.640 | 2.707 | 1.619   | 1.512 | 1.620 | 2.745 | -1.354  | -0.697 | -1.019 | 1.833 |
| S3    | 1.588           | 1.920 | 1.508 | 2.912 | 1.566       | 1.480 | 1.640 | 2.707 | 1.577   | 1.700 | 1.574 | 2.802 | -0.080  | 0.217  | -1.404 | 1.423 |
| S4    | 1.212           | 1.796 | 1.355 | 2.556 | 1.299       | 1.973 | 1.289 | 2.691 | 1.256   | 1.885 | 1.322 | 2.622 | 0.706   | 0.330  | -0.836 | 1.143 |
| S5    | 1.947           | 1.907 | 0.992 | 2.900 | 1.528       | 2.985 | 1.032 | 3.509 | 1.738   | 2.446 | 1.012 | 3.166 | -0.533  | -2.208 | -0.561 | 2.340 |
| S6    | 1.947           | 1.907 | 0.992 | 2.900 | 1.528       | 2.985 | 1.032 | 3.509 | 1.738   | 2.446 | 1.012 | 3.166 | -0.533  | -2.208 | -0.561 | 2.340 |
| S7    | 1.737           | 1.619 | 1.116 | 2.624 | 1.925       | 2.823 | 1.372 | 3.682 | 1.831   | 2.221 | 1.244 | 3.136 | -1.441  | -2.054 | -0.866 | 2.655 |
| S8    | 2.306           | 2.833 | 1.313 | 3.881 | 1.535       | 2.553 | 1.288 | 3.245 | 1.920   | 2.693 | 1.300 | 3.554 | -1.738  | -1.629 | -1.249 | 2.689 |
| S9    | 2.091           | 2.316 | 0.985 | 3.272 | 1.834       | 2.671 | 1.412 | 3.534 | 1.963   | 2.493 | 1.199 | 3.392 | -1.105  | -1.123 | -1.127 | 1.937 |
| S10   | 2.369           | 3.451 | 1.077 | 4.322 | 1.414       | 3.152 | 1.059 | 3.613 | 1.891   | 3.301 | 1.068 | 3.951 | -0.839  | -0.802 | -0.685 | 1.347 |

**Table S9.** Excitation energy (eV), excitation coefficient and  $\Delta r$  intex ( $\text{\AA}$ ) of *p*-PPI.

| State | Singlet           |                        |                  | Triplet           |                        |                  |
|-------|-------------------|------------------------|------------------|-------------------|------------------------|------------------|
|       | Excitation energy | Excitation coefficient | $\Delta r$ intex | Excitation energy | Excitation coefficient | $\Delta r$ intex |
| 1     | 3.2703            | 0.4088                 | 2.8168           | 1.2421            | 0.7347                 | 2.1928           |
| 2     | 3.3933            | 0.3913                 | 2.2034           | 1.6382            | 0.6005                 | 2.6795           |
| 3     | 3.5708            | 0.4028                 | 1.5171           | 1.7574            | 0.7137                 | 3.6964           |
| 4     | 3.6164            | 0.3903                 | 2.9287           | 1.8267            | 0.4700                 | 1.6542           |
| 5     | 3.6407            | 0.3612                 | 2.1019           | 1.8621            | 0.6741                 | 2.8306           |
| 6     | 3.6515            | 0.3033                 | 1.6490           | 1.9642            | 0.7257                 | 2.5651           |
| 7     | 3.7464            | 0.3769                 | 3.2094           | 2.2518            | 0.6418                 | 2.4273           |
| 8     | 3.7835            | 0.3469                 | 2.3971           | 2.2738            | 0.6366                 | 4.8961           |
| 9     | 3.9408            | 0.2839                 | 2.4267           | 2.3567            | 0.4896                 | 3.3768           |
| 10    | 3.9538            | 0.2803                 | 2.3975           | 2.4910            | 0.4527                 | 2.8496           |

**Table S10.** Excitation energy (eV), excitation coefficient and  $\Delta r$  intex ( $\text{\AA}$ ) of *p*-CNPPI.

| State | Singlet           |                        | $\Delta r$ intex |
|-------|-------------------|------------------------|------------------|
|       | Excitation energy | Excitation coefficient |                  |
| 1     | 0.7975            | 0.4564                 | 3.2343           |
| 2     | 1.1326            | 0.4712                 | 4.7964           |
| 3     | 1.7248            | 0.4396                 | 4.0902           |
| 4     | 2.2512            | 0.4435                 | 3.7182           |
| 5     | 2.3754            | 0.4840                 | 4.6199           |
| 6     | 2.4168            | 0.4506                 | 5.4468           |
| 7     | 2.5755            | 0.4138                 | 2.8682           |
| 8     | 2.7131            | 0.3586                 | 2.6000           |
| 9     | 2.8425            | 0.4094                 | 4.1256           |
| 10    | 2.9032            | 0.3935                 | 3.4087           |

**Table S11.** Excitation energy (eV), excitation coefficient and  $\Delta r$  intex ( $\text{\AA}$ ) of *m*-PPI.

| State | Singlet           |                        |                  |
|-------|-------------------|------------------------|------------------|
|       | Excitation energy | Excitation coefficient | $\Delta r$ intex |
| 1     | 0.5997            | 0.4666                 | 3.0437           |
| 2     | 1.5712            | 0.4612                 | 2.8729           |
| 3     | 1.7273            | 0.4377                 | 2.3364           |
| 4     | 2.0665            | 0.3821                 | 1.3925           |
| 5     | 2.0757            | 0.4393                 | 3.0422           |
| 6     | 2.1701            | 0.4256                 | 2.8190           |
| 7     | 2.5535            | 0.4200                 | 2.7773           |
| 8     | 2.6330            | 0.4106                 | 2.1899           |
| 9     | 2.8093            | 0.4075                 | 3.4323           |
| 10    | 2.8155            | 0.3869                 | 2.8880           |

**Table S12.** Excitation energy (eV), excitation coefficient and  $\Delta r$  intex ( $\text{\AA}$ ) of *m*-CNPPI.

| State | Singlet           |                        |                  | Triplet           |                        |                  |
|-------|-------------------|------------------------|------------------|-------------------|------------------------|------------------|
|       | Excitation energy | Excitation coefficient | $\Delta r$ intex | Excitation energy | Excitation coefficient | $\Delta r$ intex |
| 1     | 0.4743            | 0.4646                 | 2.3554           | 1.2118            | 0.8521                 | 0.7524           |
| 2     | 0.5846            | 0.4470                 | 3.1815           | 1.3637            | 0.8232                 | 2.5474           |
| 3     | 0.9489            | 0.4489                 | 2.6858           | 1.4339            | 0.7384                 | 2.5612           |
| 4     | 1.2134            | 0.4443                 | 2.2847           | 1.5224            | 0.7294                 | 2.0407           |
| 5     | 1.4712            | 0.4369                 | 3.2150           | 1.6485            | 0.7938                 | 2.1733           |
| 6     | 1.5469            | 0.3997                 | 1.8758           | 1.7580            | 0.70350                | 2.1163           |
| 7     | 1.8385            | 0.4224                 | 1.8674           | 1.8139            | 0.6601                 | 2.0937           |
| 8     | 1.9125            | 0.3442                 | 2.4355           | 1.8240            | 0.6540                 | 1.8880           |
| 9     | 1.9501            | 0.3918                 | 1.9242           | 1.8616            | 0.7903                 | 2.5198           |
| 10    | 2.0421            | 0.3690                 | 2.7169           | 2.1267            | 0.6669                 | 1.9693           |

**Table S13.** Singlet ( $E_S$ ) energies (eV), oscillator strength ( $f$ ), dipole moment ( $\mu$ , D) of *p*-CNPPI.

| Energy level | $E_S$ | Oscillator strength ( $f$ ) | $\mu$ | NTO Transitions              |
|--------------|-------|-----------------------------|-------|------------------------------|
| 1            | 0.8   | 0.07                        | 2.11  | 85%<br>143 $\rightarrow$ 144 |
| 2            | 1.13  | 0.01                        | 1.77  | 53%<br>143 $\rightarrow$ 146 |
| 3            | 1.72  | 0.05                        | 1.18  | 83%<br>142 $\rightarrow$ 144 |
| 4            | 2.25  | 0.08                        | 0.65  | 30%<br>143 $\rightarrow$ 154 |
| 5            | 2.38  | 0.01                        | 0.53  | 46%<br>143 $\rightarrow$ 145 |
| 6            | 2.42  | 0.09                        | 0.49  | 45%<br>142 $\rightarrow$ 146 |
| 7            | 2.58  | 0.01                        | 0.33  | 28%<br>142 $\rightarrow$ 150 |
| 8            | 2.71  | 0.06                        | 0.19  | 21%<br>143 $\rightarrow$ 150 |
| 9            | 2.84  | 0.03                        | 0.06  | 19%<br>143 $\rightarrow$ 147 |
| 10           | 2.9   | 0.01                        | 0.00  | 19%<br>140 $\rightarrow$ 144 |

**Table S14.** Computed singlet ( $E_S$ ) and triplet ( $E_T$ ) energies (eV), oscillator strength ( $f$ ), dipole moment ( $\mu$ , D) and singlet-triplet splitting ( $\Delta E_{ST}$ , eV) of *p*-PPI.

| Energy level | $E_S$ | Oscillator strength ( $f$ ) | $\mu$ | NTO Transitions             | $E_T$ | $\Delta E_{ST}$ | NTO Transitions             |
|--------------|-------|-----------------------------|-------|-----------------------------|-------|-----------------|-----------------------------|
| 1            | 3.27  | 0.46                        | 2.04  | <sup>59%</sup><br>138 → 140 | 1.24  | 2.26            | <sup>57%</sup><br>137 → 141 |
| 2            | 3.39  | 0.52                        | 2.76  | <sup>57%</sup><br>139 → 142 | 1.64  | 2.52            | <sup>30%</sup><br>138 → 141 |
| 3            | 3.57  | 0.27                        | 0.75  | <sup>62%</sup><br>137 → 141 | 1.76  | 2.67            | <sup>28%</sup><br>139 → 142 |
| 4            | 3.62  | 0.01                        | 0.91  | <sup>22%</sup><br>139 → 144 | 1.83  | 2.73            | <sup>18%</sup><br>134 → 142 |
| 5            | 3.64  | 0.05                        | 0.53  | <sup>24%</sup><br>139 → 144 | 1.86  | 2.75            | <sup>26%</sup><br>140 → 147 |
| 6            | 3.65  | 0.04                        | 1.19  | <sup>42%</sup><br>136 → 140 | 1.96  | 2.81            | <sup>54%</sup><br>140 → 150 |
| 7            | 3.75  | 0.01                        | 0.64  | <sup>29%</sup><br>138 → 146 | 2.25  | 3.00            | <sup>31%</sup><br>137 → 153 |
| 8            | 3.78  | 0.05                        | 0.49  | <sup>19%</sup><br>134 → 143 | 2.27  | 3.03            | <sup>32%</sup><br>137 → 139 |
| 9            | 3.94  | 0.07                        | 0.62  | <sup>21%</sup><br>134 → 143 | 2.36  | 3.15            | <sup>20%</sup><br>137 → 152 |
| 10           | 3.95  | 0.04                        | 0.96  | <sup>19%</sup><br>137 → 142 | 2.49  | 3.22            | <sup>20%</sup><br>136 → 139 |



**Table S15.** Computed singlet ( $E_S$ ) and triplet ( $E_T$ ) energies (eV), oscillator strength ( $f$ ), dipole moment ( $\mu$ , D) and singlet-triplet splitting ( $\Delta E_{ST}$ , eV) of *m*-CNPPI.

| Energy level | $E_S$ | Oscillator strength ( $f$ ) | $\mu$  | NTO Transitions                         | $E_T$ | $\Delta E_{ST}$ | NTO Transitions                         |
|--------------|-------|-----------------------------|--------|-----------------------------------------|-------|-----------------|-----------------------------------------|
| 1            | 0.47  | 0.01                        | 1.5678 | <sup>52%</sup><br>142 $\rightarrow$ 144 | 1.11  | 0.79            | <sup>92%</sup><br>141 $\rightarrow$ 143 |
| 2            | 0.58  | 0.01                        | 1.4575 | <sup>51%</sup><br>143 $\rightarrow$ 144 | 1.36  | 0.97            | <sup>85%</sup><br>142 $\rightarrow$ 143 |
| 3            | 0.95  | 0.00                        | 1.0932 | <sup>58%</sup><br>143 $\rightarrow$ 145 | 1.43  | 1.19            | <sup>43%</sup><br>142 $\rightarrow$ 145 |
| 4            | 1.21  | 0.03                        | 0.8287 | <sup>44%</sup><br>142 $\rightarrow$ 145 | 1.52  | 1.36            | <sup>51%</sup><br>141 $\rightarrow$ 146 |
| 5            | 1.47  | 0.03                        | 0.5709 | <sup>60%</sup><br>143 $\rightarrow$ 146 | 1.65  | 1.56            | <sup>50%</sup><br>142 $\rightarrow$ 150 |
| 6            | 1.55  | 0.04                        | 0.4952 | <sup>42%</sup><br>141 $\rightarrow$ 144 | 1.76  | 1.65            | <sup>46%</sup><br>143 $\rightarrow$ 150 |
| 7            | 1.84  | 0.00                        | 0.2036 | <sup>32%</sup><br>141 $\rightarrow$ 144 | 1.81  | 1.82            | <sup>29%</sup><br>140 $\rightarrow$ 143 |
| 8            | 1.91  | 0.07                        | 0.1296 | <sup>26%</sup><br>142 $\rightarrow$ 151 | 1.82  | 1.86            | <sup>24%</sup><br>140 $\rightarrow$ 145 |
| 9            | 1.95  | 0.01                        | 0.0920 | <sup>41%</sup><br>142 $\rightarrow$ 151 | 1.86  | 1.90            | <sup>43%</sup><br>141 $\rightarrow$ 144 |
| 10           | 2.04  | 0.05                        | 0.0000 | <sup>35%</sup><br>142 $\rightarrow$ 151 | 2.13  | 2.08            | <sup>30%</sup><br>142 $\rightarrow$ 143 |

**Table S16.** Computed singlet ( $E_S$ ) and triplet ( $E_T$ ) energies (eV), oscillator strength ( $f$ ), dipole moment ( $\mu$ , D) of *m*-PPI.

| Energy level | $E_S$ | Oscillator strength ( $f$ ) | $\mu$ | NTO Transition               |
|--------------|-------|-----------------------------|-------|------------------------------|
| 1            | 0.6   | 0.01                        | 2.22  | 71%<br>139 $\rightarrow$ 140 |
| 2            | 1.57  | 0.03                        | 1.24  | 25%<br>139 $\rightarrow$ 149 |
| 3            | 1.73  | 0.10                        | 1.09  | 48%<br>139 $\rightarrow$ 142 |
| 4            | 2.07  | 0.15                        | 0.75  | 66%<br>138 $\rightarrow$ 140 |
| 5            | 2.08  | 0.02                        | 0.74  | 23%<br>139 $\rightarrow$ 143 |
| 6            | 2.17  | 0.04                        | 0.65  | 39%<br>139 $\rightarrow$ 141 |
| 7            | 2.55  | 0.09                        | 0.26  | 42%<br>139 $\rightarrow$ 141 |
| 8            | 2.63  | 0.03                        | 0.18  | 40%<br>135 $\rightarrow$ 140 |
| 9            | 2.81  | 0.02                        | 0.01  | 39%<br>139 $\rightarrow$ 141 |
| 10           | 2.82  | 0.03                        | 0.00  | 27%<br>139 $\rightarrow$ 156 |

## Reference

- [1] (a) M. Segal, M. Singh, K. Rivoir, S. Difley, T. V. Voorhis, M. A. Baldo, *Nat. Mater.*, **2007**, 6, 374; (b) W. Barford, *Phys. Rev. B.*, **2004**, 70, 205204.
- [2] W. Jiang, L. Duan Qiao, *J. Org. Lett.*, **2011**, 13, 3146.
